# Supplementary material for: Structural Insight into How Bacteria Prevent Interference between Multiple Divergent Type IV Secretion Systems
Source: PubMed Central journal article supplement — mBio. 2015 Dec 8;6(6):e01867-15. doi: 10.1128/mBio.01867-15 (PMC4676284; doi:10.1128/mbio.01867-15), 2015-12-08
Supplement: mbo006152580s1.pdf [file mbo006152580s1.pdf]

**Document S1.** Associated data pertaining to phylogeny estimations of P-T4SSs.

### Proteins utilized for phylogeny estimation of P-T4SSs

For 75 P-T4SSs encoded within diverse proteobacterial genomes, five proteins (VirB4, VirB8-VirB11) were selected for analysis (**Table 1**). Additionally, second copies of RvhB4, RvhB8 and RvhB9 encoded within Rickettsiales genomes were treated as a minimal T4SS (*rvh-II*), resulting in 90 P-T4SSs in total. NCBI GenBank accession numbers for all proteins are provided.

### Phylogeny estimations of P-type type IV secretion systems (P-T4SSs)

Phylogenies were estimated from concatenated alignments of five components (VirB4, VirB8-VirB11), except for *rvhB-II*, which contains homologs to VirB4, VirB8 and VirB9 only (see text for further details on alignment and dataset construction) (**fig. 1**). (A) ML-based phylogeny estimated on the unmasked alignment (LG + gamma + I). This tree is further described in **fig. 2** of the manuscript. (B) ML-based phylogeny estimated on the unmasked alignment (WAG + gamma + I). (C) ML-based phylogeny estimated on the masked alignment (LG + gamma + I). (D) ML-based phylogeny estimated on the masked alignment (WAG + gamma + I). (E) Bayesian inference of phylogeny based on the masked alignment (CAT-GTR). All ML-based estimations were generated using RAxML v.7.2.8 (Stamatakis 2014), with branch support assessed with 1000 bootstrap pseudoreplications. Bayesian analysis employed PhyloBayes v3.3 (Lartillot et al. 2009), with branch support measured by frequency of clades within the posterior distribution of trees. See text for further details pertaining to dataset construction, alignment and ML and Bayesian search strategies. All trees were rooted with four P-T4SSs from species of *Epsilonproteobacteria*. *rvh-I* and *rvh-II* T4SSs are shaded light and dark gray, respectively. Orange circles denote the clade unifying the *rvh-I* and *rvh-II* paralogs. The *Bartonella vir*, *vbh* and *trw* T4SSs are each colored distinct shades of green.

## REFERENCES

- Lartillot N, Lepage T, Blanquart S. 2009. PhyloBayes 3: a Bayesian software package for phylogenetic reconstruction and molecular dating. *Bioinformatics* [Internet] 25:2286–2288. Available from: <http://www.ncbi.nlm.nih.gov/pubmed/19535536>
- Stamatakis A. 2014. RAxML version 8: A tool for phylogenetic analysis and post-analysis of large phylogenies. *Bioinformatics* 30:1312–1313.

## Table 1 (Document S1)

**Table 1 (Document S1).** Proteins utilized for phylogeny estimation of P-T4SSs.

| Taxon <sup>@</sup>                                               | Locale <sup>~</sup> | VirB4 <sup>^</sup> | VirB8 <sup>§</sup> | VirB9        | VirB10 <sup>#</sup> | VirB11 <sup>#</sup> |
|------------------------------------------------------------------|---------------------|--------------------|--------------------|--------------|---------------------|---------------------|
| <i>Wolinella succinogenes</i> str. DSM 1740                      | Chromosome          | NP_907292          | NP_907290          | NP_907289    | NP_907288           | NP_907286           |
| <i>Campylobacter jejuni</i> subsp. <i>jejuni</i> 81-176          | pVir                | NP_863348          | NP_863298          | NP_863299    | NP_863300           | NP_863302           |
| <i>Helicobacter pylori</i> str. J99                              | Chromosome          | NP_222737          | NP_222756          | NP_222757    | NP_222758           | NP_224034           |
| <i>Helicobacter pylori</i> str. PeCan18B                         | Chromosome          | AAM03033           | AAM03034           | AAM03035     | AAM03036            | AAM03040            |
| <i>Legionella pneumophila</i> str. Corby                         | Chromosome          | YP_001249518       | YP_001249519       | YP_001249520 | YP_001249522        | YP_001249515        |
| <i>Photobacterium profundum</i> str. SS9                         | Chromosome          | YP_133260          | YP_133264          | YP_133265    | YP_133267           | YP_133262           |
| <i>Mesorhizobium loti</i> str. MAFF303099                        | Chromosome          | NP_106918          | NP_106921          | NP_106922    | NP_106923           | NP_106916           |
| <i>Mesorhizobium loti</i> str. MAFF303099                        | pMLb                | NP_109464          | NP_109461          | NP_109460    | NP_109459           | NP_109467           |
| " <i>Candidatus</i> Midichloria mitochondrii" str. IricVA        | I; Chromosome       | ---                | YP_004679440       | YP_004679865 | YP_004679438        | YP_004679437        |
| <i>Rickettsia typhi</i> str. Wilmington                          | I; Chromosome       | YP_067003          | YP_067242          | YP_067239    | YP_067244           | YP_067245           |
| <i>Rickettsia bellii</i> str. RML369-C                           | I; Chromosome       | YP_538436          | YP_538184          | YP_538182    | YP_538186           | YP_538187           |
| Rickettsiaceae bacterium str. Os18                               | I; Chromosome       | WP_019230792       | WP_019230975       | WP_019231305 | WP_019230977        | WP_019230978        |
| <i>Orientia tsutsugamushi</i> str. Boryong                       | I; Chromosome       | YP_001249140       | YP_001248090       | YP_001248270 | YP_001248092        | YP_001248093        |
| <i>Orientia tsutsugamushi</i> str. Ikeda                         | I; Chromosome       | YP_001937462       | YP_001938263       | YP_001937770 | YP_001938261        | YP_001938260        |
| " <i>Candidatus</i> Xenolissoclinum pacificiensis" str. L6       | I; Chromosome       | ETO91781           | ETO91952           | ETO91160     | ETO91954            | ETO91955            |
| <i>Neorickettsia sennetsu</i> str. Miyayama                      | I; Chromosome       | YP_506730          | YP_506619          | YP_506105    | YP_506617           | YP_506616           |
| <i>Neorickettsia risticii</i> str. Illinois                      | I; Chromosome       | YP_003082035       | YP_003081929       | YP_003081432 | YP_003081926        | YP_003081925        |
| <i>Wolbachia</i> endosymbiont ( <i>Drosophila melanogaster</i> ) | I; Chromosome       | NP_966608          | NP_965838          | NP_966824    | NP_965840           | NP_965841           |
| <i>Wolbachia</i> endosymbiont str. TRS ( <i>Brugia malayi</i> )  | I; Chromosome       | YP_198627          | YP_198110          | YP_198421    | YP_198112           | YP_198113           |
| <i>Anaplasma marginale</i> str. St. Maries                       | I; Chromosome       | YP_153996          | YP_154363          | YP_153506    | YP_154361           | YP_154360           |
| <i>Anaplasma phagocytophilum</i> str. HZ                         | I; Chromosome       | YP_504979          | YP_505898          | YP_504712    | YP_505896           | YP_505895           |
| <i>Ehrlichia chaffeensis</i> str. Arkansas                       | I; Chromosome       | YP_507310          | YP_506876          | YP_507042    | YP_506874           | YP_506873           |
| <i>Ehrlichia canis</i> str. Jake                                 | I; Chromosome       | YP_303167          | YP_302671          | YP_303416    | YP_302669           | YP_302668           |
| " <i>Candidatus</i> Midichloria mitochondrii" str. IricVA        | II; Chromosome      | YP_004679293       | YP_004679866       | YP_004679439 | ---                 | ---                 |
| <i>Rickettsia bellii</i> str. RML369-C                           | II; Chromosome      | YP_537250          | YP_538183          | YP_538185    | ---                 | ---                 |
| <i>Rickettsia typhi</i> str. Wilmington                          | II; Chromosome      | YP_067709          | YP_067240          | YP_067243    | ---                 | ---                 |
| Rickettsiaceae bacterium str. Os18                               | II; Chromosome      | WP_019231477       | WP_019231304       | WP_019230976 | ---                 | ---                 |
| <i>Orientia tsutsugamushi</i> str. Ikeda                         | II; Chromosome      | YP_001936694       | YP_001937769       | YP_001938262 | ---                 | ---                 |

**Table 1 (Document S1)**

| <b>Taxon</b> <sup>@</sup>                                                      | <b>Locale</b> <sup>~</sup> | <b>VirB4</b> <sup>^</sup> | <b>VirB8</b> <sup>\$</sup> | <b>VirB9</b> | <b>VirB10</b> <sup>#</sup> | <b>VirB11</b> <sup>#</sup> |
|--------------------------------------------------------------------------------|----------------------------|---------------------------|----------------------------|--------------|----------------------------|----------------------------|
| <i>Orientia tsutsugamushi</i> str. Boryong                                     | II; Chromosome             | YP_001248630              | YP_001248271               | YP_001248091 | ---                        | ---                        |
| " <i>Candidatus Xenolissoclinum pacificiensis</i> " str. L6                    | II; Chromosome             | ETO91710                  | ETO91161                   | ETO91953     | ---                        | ---                        |
| <i>Neorickettsia sennetsu</i> str. Miyayama                                    | II; Chromosome             | YP_506641                 | YP_506106                  | YP_506618    | ---                        | ---                        |
| <i>Neorickettsia risticii</i> str. Illinois                                    | II; Chromosome             | YP_003081947              | YP_003081433               | YP_003081928 | ---                        | ---                        |
| <i>Wolbachia endosymbiont</i> str. TRS ( <i>Brugia malayi</i> )                | II; Chromosome             | YP_198580                 | YP_198471                  | YP_198111    | ---                        | ---                        |
| <i>Wolbachia endosymbiont (Drosophila melanogaster)</i>                        | II; Chromosome             | WP_010963077              | WP_010082435               | WP_010962300 | ---                        | ---                        |
| <i>Anaplasma marginale</i> str. St. Maries                                     | II; Chromosome             | YP_154174                 | YP_153956                  | YP_154362    | ---                        | ---                        |
| <i>Anaplasma phagocytophilum</i> str. HZ                                       | II; Chromosome             | YP_505671                 | YP_505033 <sup>\$</sup>    | YP_505897    | ---                        | ---                        |
| <i>Ehrlichia canis</i> str. Jake                                               | II; Chromosome             | YP_303468                 | YP_303086                  | YP_302670    | ---                        | ---                        |
| <i>Ehrlichia chaffeensis</i> str. Arkansas                                     | II; Chromosome             | YP_507826                 | YP_507390                  | YP_506875    | ---                        | ---                        |
| <i>Legionella longbeachae</i> str. D-4968                                      | Chromosome                 | EEZ95953                  | EEZ95948                   | EEZ95947     | EEZ95946                   | EEZ95945                   |
| <i>Legionella pneumophila</i> subsp. <i>pneumophila</i><br>str. Philadelphia 1 | Chromosome                 | YP_095285                 | YP_095280                  | YP_095279    | YP_095278                  | YP_095277                  |
| <i>Legionella pneumophila</i> str. Paris                                       | Chromosome                 | YP_122517                 | YP_122522                  | YP_122523    | YP_122524                  | YP_122525                  |
| <i>Legionella pneumophila</i> str. Lens                                        | Chromosome                 | YP_125529                 | YP_125534                  | YP_125535    | YP_125536                  | YP_125537                  |
| <i>Burkholderia multivorans</i> str. CGD1                                      | Chromosome                 | WP_006402578              | WP_006402582               | WP_006402583 | WP_006402584               | WP_006402586               |
| <i>Pseudomonas fluorescens</i> str. HK44                                       | pUTK21                     | EXF91007                  | EXF91012                   | EXF91013     | EXF91014                   | EXF91015                   |
| <i>Pseudomonas putida</i> (unknown strain)                                     | pWW0                       | NP_542928                 | NP_542923                  | NP_542922    | NP_542921                  | NP_542920                  |
| <i>Ralstonia solanacearum</i> str. CMR15                                       | pRSC35                     | YP_005995023              | YP_005995018               | YP_005995017 | YP_005995016               | YP_005995015               |
| <i>Xanthomonas citri</i> subsp. <i>citri</i>                                   | pXcB                       | NP_942610                 | NP_942615                  | NP_942616    | NP_942617                  | NP_942618                  |
| <i>Cupriavidus basilensis</i> str. OR16                                        | Chromosome                 | WP_006156658              | WP_006156661               | WP_006156662 | WP_006156663               | WP_006156664               |
| <i>Shinella zoogloeoides</i> str. DD12                                         | Chromosome                 | EYR82770                  | EYR82763                   | EYR82762     | EYR82761                   | EYR82760                   |
| <i>Nitrobacter hamburgensis</i> str. X14                                       | "plasmid 2"                | YP_571861                 | YP_571856                  | YP_571855    | YP_571854                  | YP_571853                  |
| <i>Mesorhizobium loti</i> str. MAFF303099                                      | pMLa                       | NP_085793                 | NP_085797                  | NP_085798    | NP_085799                  | NP_085800                  |
| <i>Sandarakinorhabdus limnophila</i> (unknown strain)                          | Chromosome                 | WP_022678817              | WP_022678815               | WP_022678814 | WP_022678813               | WP_022678812               |
| <i>Sphingomonas phyllosphaerae</i> (unknown strain)                            | Chromosome                 | WP_022685007              | WP_022685009               | WP_022685010 | WP_022685011               | WP_022685012               |
| <i>Sphingobium chlorophenolicum</i> str. L-1                                   | Chromosome                 | YP_004553681              | YP_004553679               | YP_004553678 | YP_004553677               | YP_004553676               |
| <i>Gilvimirinus chinensis</i> (unknown strain)                                 | Chromosome                 | WP_020211024              | WP_020211028               | WP_020211029 | WP_020211030               | WP_020211031               |
| <i>Phenylobacterium zucineum</i> str. HLK1                                     | Chromosome                 | YP_002131189              | YP_002131192               | YP_002131193 | YP_002131194               | YP_002131195               |
| <i>Agrobacterium tumefaciens</i> str. LBA4213 (Ach5)                           | pTi                        | AHK05284                  | AHK05288                   | AHK05289     | AHK05290                   | AHK05291                   |

**Table 1 (Document S1)**

| <b>Taxon</b> <sup>@</sup>                                             | <b>Locale</b> <sup>~</sup> | <b>VirB4</b> <sup>^</sup> | <b>VirB8</b> <sup>\$</sup> | <b>VirB9</b> | <b>VirB10</b> <sup>#</sup> | <b>VirB11</b> <sup>#</sup> |
|-----------------------------------------------------------------------|----------------------------|---------------------------|----------------------------|--------------|----------------------------|----------------------------|
| <i>Ochrobactrum anthropi</i> str. ATCC 49188                          | Chromosome                 | YP_001369231              | YP_001369236               | YP_001369237 | YP_001369238               | YP_001369239               |
| <i>Agrobacterium fabrum</i> str. C58                                  | pAt                        | NP_396095                 | NP_396099                  | NP_396100    | NP_396101                  | NP_396102                  |
| <i>Sinorhizobium meliloti</i> str. 1021                               | pSymA                      | NP_435962                 | NP_435958                  | NP_435957    | NP_435956                  | NP_435955                  |
| <i>Bartonella birtlesii</i> str. LL-WM9                               | Chromosome                 | EJF74241                  | EJF74251                   | EJF74252     | EJF74253                   | EJF74254                   |
| <i>Bartonella tribocorum</i> str. CIP 105476                          | Chromosome                 | CAK02346                  | CAK02353                   | CAK02354     | CAK02355                   | CAK02356                   |
| <i>Bartonella grahamii</i> str. as4aup                                | Chromosome                 | YP_002972601              | YP_002972609               | YP_002972610 | YP_002972611               | YP_002972612               |
| <i>Bartonella grahamii</i> str. as4aup                                | Chromosome                 | YP_002972815              | YP_002972820               | YP_002972821 | YP_002972822               | YP_002972823               |
| <i>Bartonella quintana</i> str. Toulouse                              | Chromosome                 | YP_032622                 | YP_032626                  | YP_032627    | YP_032628                  | YP_032629                  |
| <i>Bartonella henselae</i> str. Houston-1                             | Chromosome                 | YP_034053                 | YP_034057                  | YP_034058    | YP_034059                  | YP_034060                  |
| <i>Bartonella birtlesii</i> str. LL-WM9                               | Chromosome                 | EJF74266                  | EJF74270                   | EJF74271     | EJF74272                   | EJF74273                   |
| <i>Bartonella grahamii</i> str. as4aup                                | Chromosome                 | YP_002972359              | YP_002972363               | YP_002972364 | YP_002972365               | YP_002972366               |
| <i>Bartonella tribocorum</i> str. CIP 105476                          | Chromosome                 | CAK02005                  | CAK02009                   | CAK02010     | CAK02011                   | CAK02012                   |
| <i>Pseudomonas putida</i> str. LD209                                  | pLD209                     | YP_008994870              | YP_008994866               | YP_008994865 | YP_008994864               | YP_008994863               |
| <i>Xylella fastidiosa</i> str. 9a5c                                   | pXF51                      | NP_061663                 | NP_061668                  | NP_061669    | NP_061670                  | NP_061671                  |
| <i>Aeromonas caviae</i> str. HGB5                                     | pFBAOT6                    | YP_067837                 | YP_067832                  | YP_067831    | YP_067830                  | YP_067829                  |
| <i>Stenotrophomonas maltophilia</i> str. EPM1                         | Chromosome                 | EMF61225                  | EMF61232                   | EMF61231     | EMF61230                   | EMF61229                   |
| <i>Xanthomonas campestris</i> pv. <i>campestris</i> str. 8004         | Chromosome                 | AAAY48705                 | AAAY48698                  | AAAY48699    | AAAY48700                  | AAAY48701                  |
| <i>Yersinia pestis</i> biovar Microtus str. 91001                     | pCRY                       | NP_995423                 | NP_995427                  | NP_995428    | NP_995429                  | NP_995430                  |
| <i>Campylobacter jejuni</i> subsp. <i>jejuni</i> 81-176               | pTet                       | <u>YP_063475</u>          | YP_063483                  | YP_063484    | YP_063485                  | YP_063486                  |
| <i>Campylobacter coli</i> str. CVM N29710                             | pN29710-1                  | <u>YP_008543104</u>       | YP_008543112               | YP_008543113 | YP_008543114               | YP_008543115               |
| <i>Vibrio fischeri</i> str. ES114                                     | pES100                     | YP_207169                 | YP_207170                  | YP_207171    | YP_207172                  | YP_207173                  |
| <i>Bordetella pertussis</i> str. Tohama I                             | Chromosome                 | NP_882289                 | NP_882292                  | NP_882293    | NP_882294                  | NP_882295                  |
| Rhizosphere of <i>Medicago sativa</i> (alfalfa) *                     | pSB102                     | NP_361048                 | NP_361042                  | NP_361041    | NP_361040                  | NP_361039                  |
| <i>Brucella suis</i> str. ATCC 23445                                  | Chromosome                 | YP_001621919              | YP_001621915               | YP_001621914 | YP_001621913               | YP_001621912               |
| <i>Pseudomonas syringae</i> pv. <i>syringae</i> str. A2               | pPSR1                      | NP_940726                 | NP_940730                  | NP_940731    | NP_940732                  | NP_940733                  |
| <i>Erwinia amylovora</i> str. UTRJ2                                   | pEU30                      | NP_943280                 | NP_943283                  | NP_943284    | NP_943285                  | NP_943286                  |
| <i>Escherichia coli</i> O25b:H4-ST131 str. EC958                      | pKC394                     | YP_003717495              | YP_003717500               | YP_003717501 | YP_003717502               | YP_003717503               |
| <i>Salmonella enterica</i> subsp. <i>enterica</i> serovar Typhimurium | pR46 (IncN)                | NP_511190                 | NP_511195                  | NP_511196    | NP_511197                  | NP_511198                  |
| <i>Bartonella quintana</i> str. Toulouse                              | Chromosome                 | YP_032785                 | YP_032792                  | YP_032793    | YP_032794                  | YP_032795                  |

**Table 1 (Document S1)**

| <b>Taxon</b> <sup>Ⓔ</sup>                    | <b>Locale</b> <sup>~</sup> | <b>VirB4</b> <sup>^</sup> | <b>VirB8</b> <sup>§</sup> | <b>VirB9</b> | <b>VirB10</b> <sup>#</sup> | <b>VirB11</b> <sup>#</sup> |
|----------------------------------------------|----------------------------|---------------------------|---------------------------|--------------|----------------------------|----------------------------|
| <i>Bartonella henselae</i> str. Houston-1    | Chromosome                 | YP_034262                 | YP_034269                 | YP_034270    | YP_034271                  | YP_034272                  |
| <i>Bartonella birtlesii</i> str. LL-WM9      | Chromosome                 | EJF76413                  | EJF76425                  | EJF76426     | EJF76427                   | EJF76428                   |
| <i>Bartonella grahamii</i> str. as4aup       | Chromosome                 | YP_002972703              | YP_002972716              | YP_002972717 | YP_002972718               | YP_002972719               |
| <i>Bartonella tribocorum</i> str. CIP 105476 | Chromosome                 | CAK02481                  | CAK02496                  | CAK02497     | CAK02498                   | CAK02499                   |

<sup>Ⓔ</sup> Taxa are listed from top to bottom as they appear in the phylogeny. Asterisk denotes 'Rhizosphere of *Medicago sativa* (alfalfa)', for which the laboratory host is *Sinorhizobium meliloti* strain FP2. All sequence IDs are NCBI GenBank protein accession numbers.

<sup>~</sup> Unless plasmids are specified in the NCBI annotation, 'chromosome' is listed. For the *rvh* T4SS, see text for description of *rvh-I* and *rvh-II*.

<sup>^</sup> Underlined numbers refer to VirB3/VirB4 fusions. The asterisk refers to a missing gene encoding an RvhB4a homolog for "*Candidatus* Midichloria mitochondrii" str. IricVA.

<sup>§</sup> For *Anaplasma phagocytophilum* str. HZ (*rvh-II*) a homolog from str. HZ2 (YP\_008332568) was used since it contains a full length N-terminal sequence.

<sup>#</sup> For *rvh-II*, asterisks denote the RvhB10 and RvhB11 proteins that were used for *rvh-I* only (see text for details).

**A**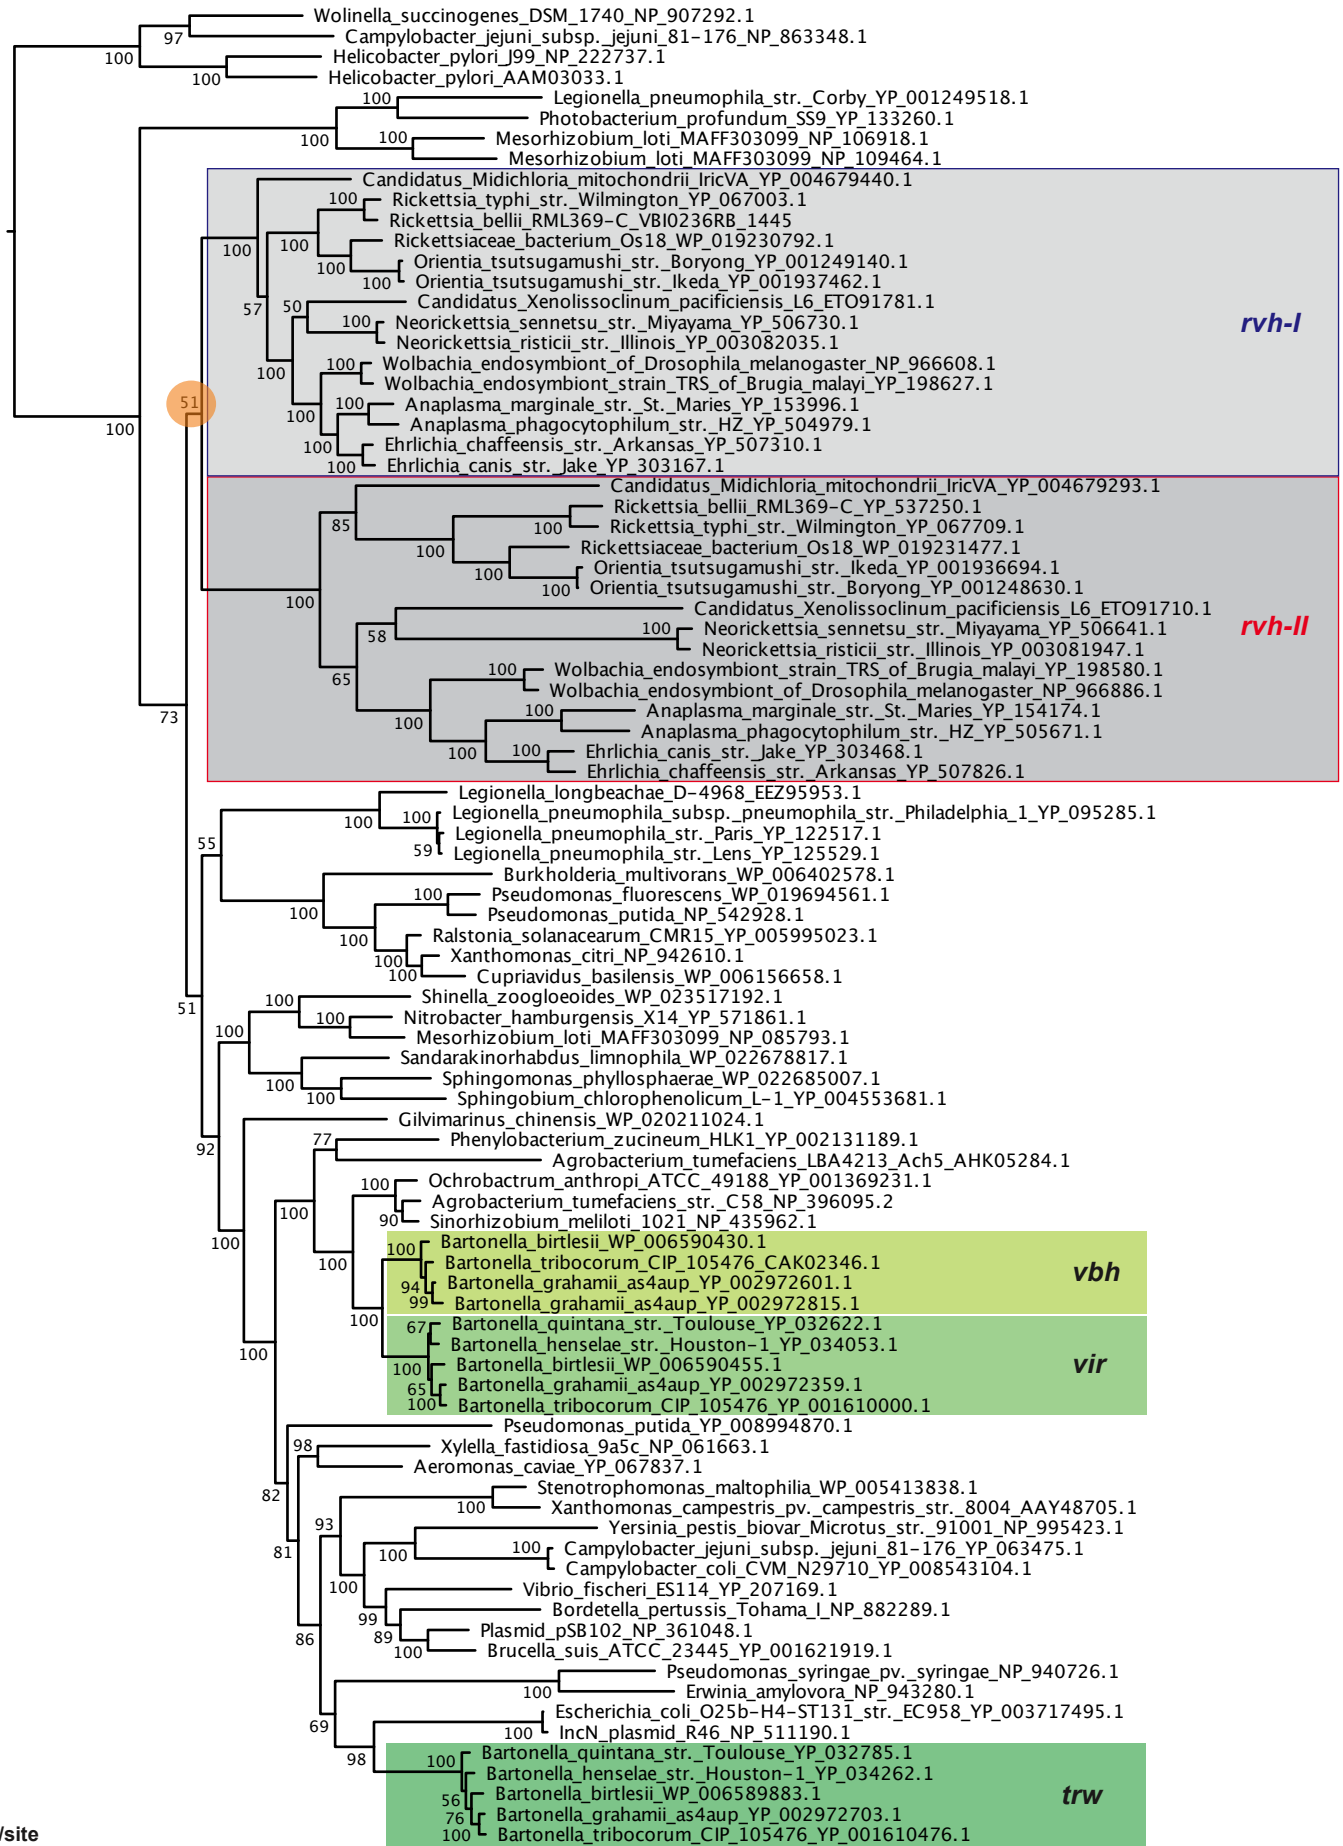**Fig. 1 (Document S1)**

- 0.1 sub/site

**B**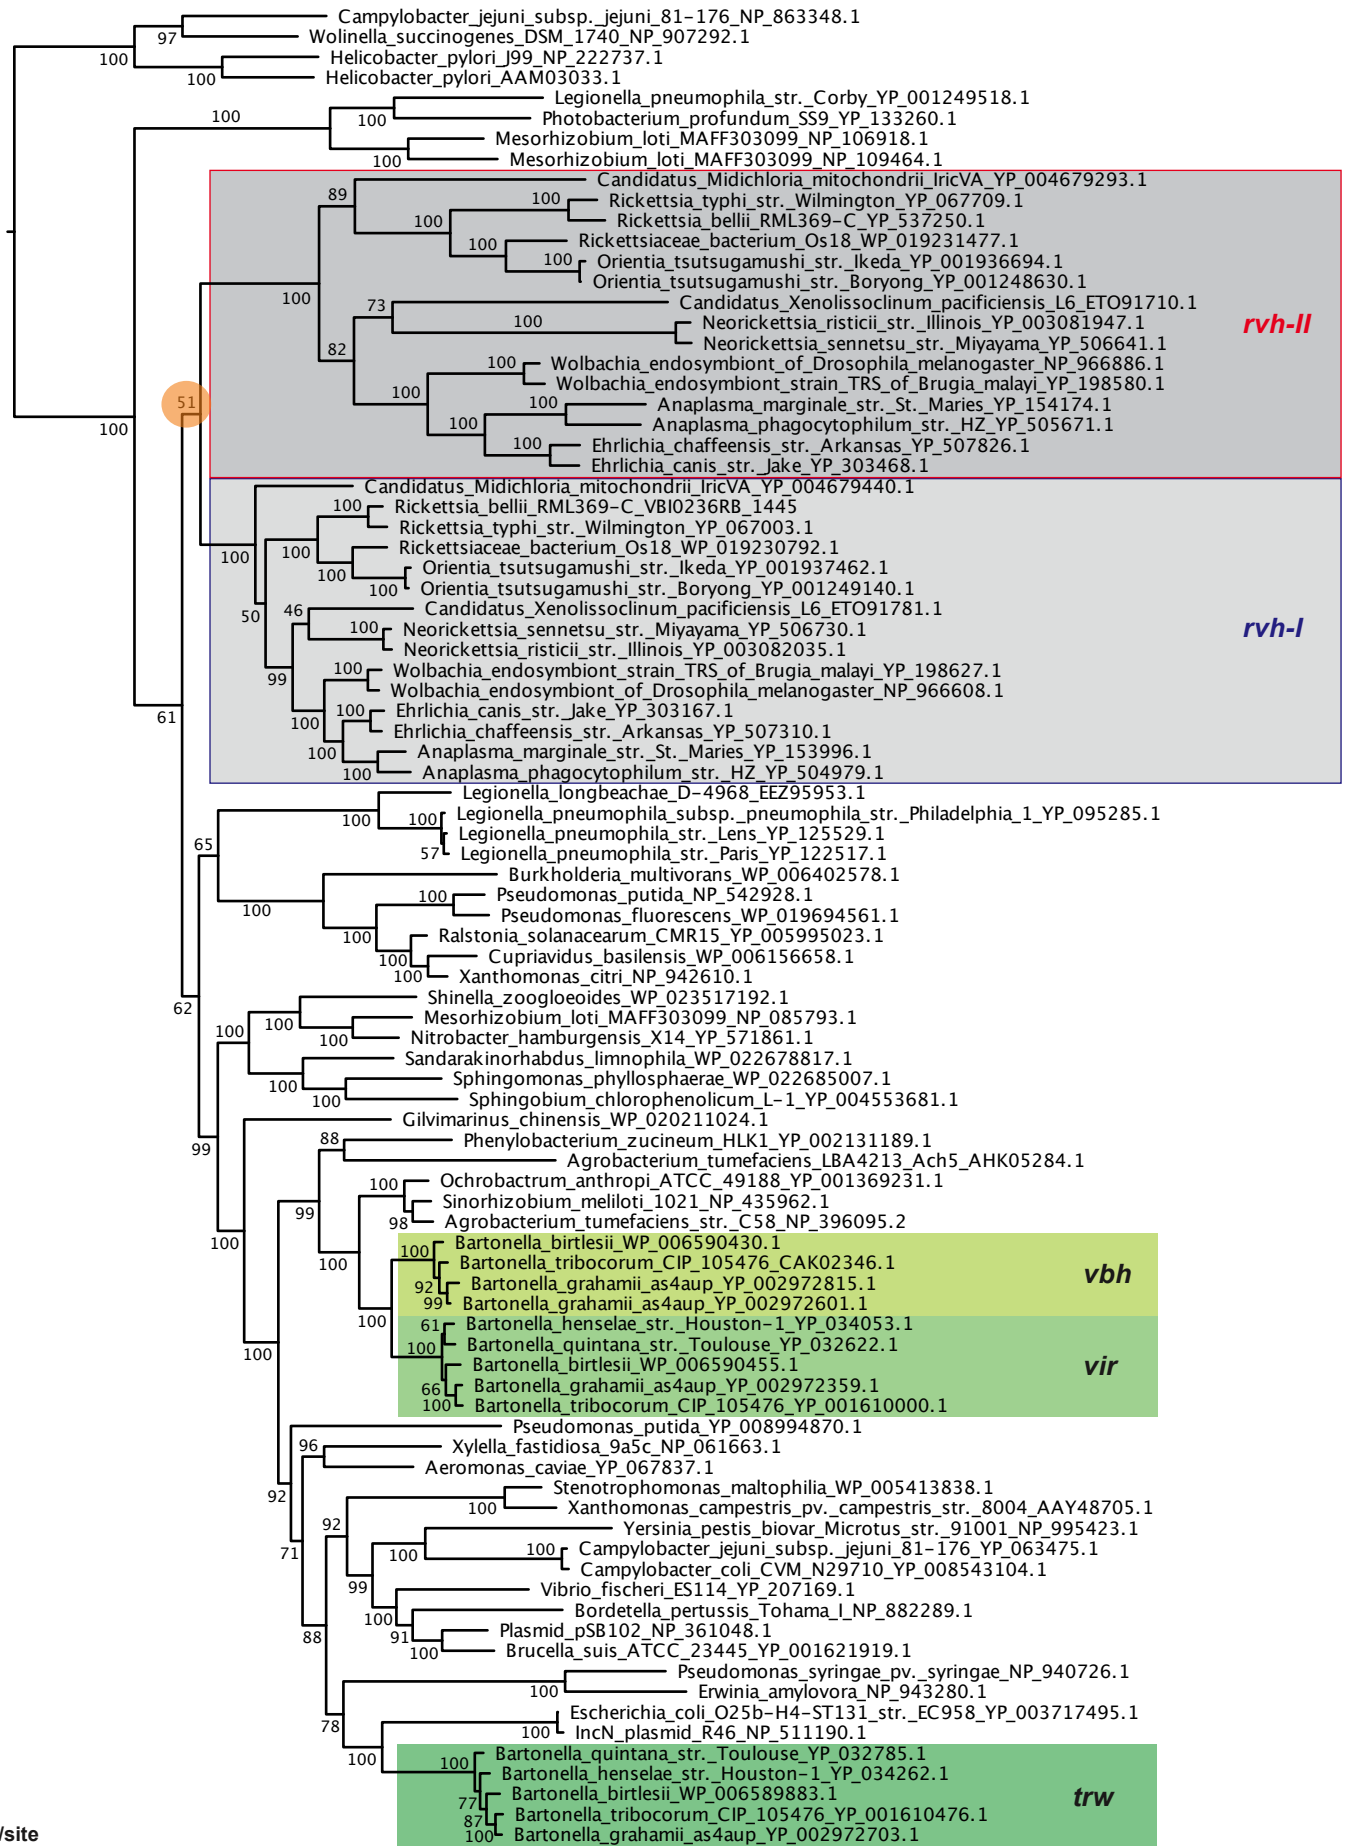**Fig. 1 (Document S1)**

— 0.1 sub/site



C

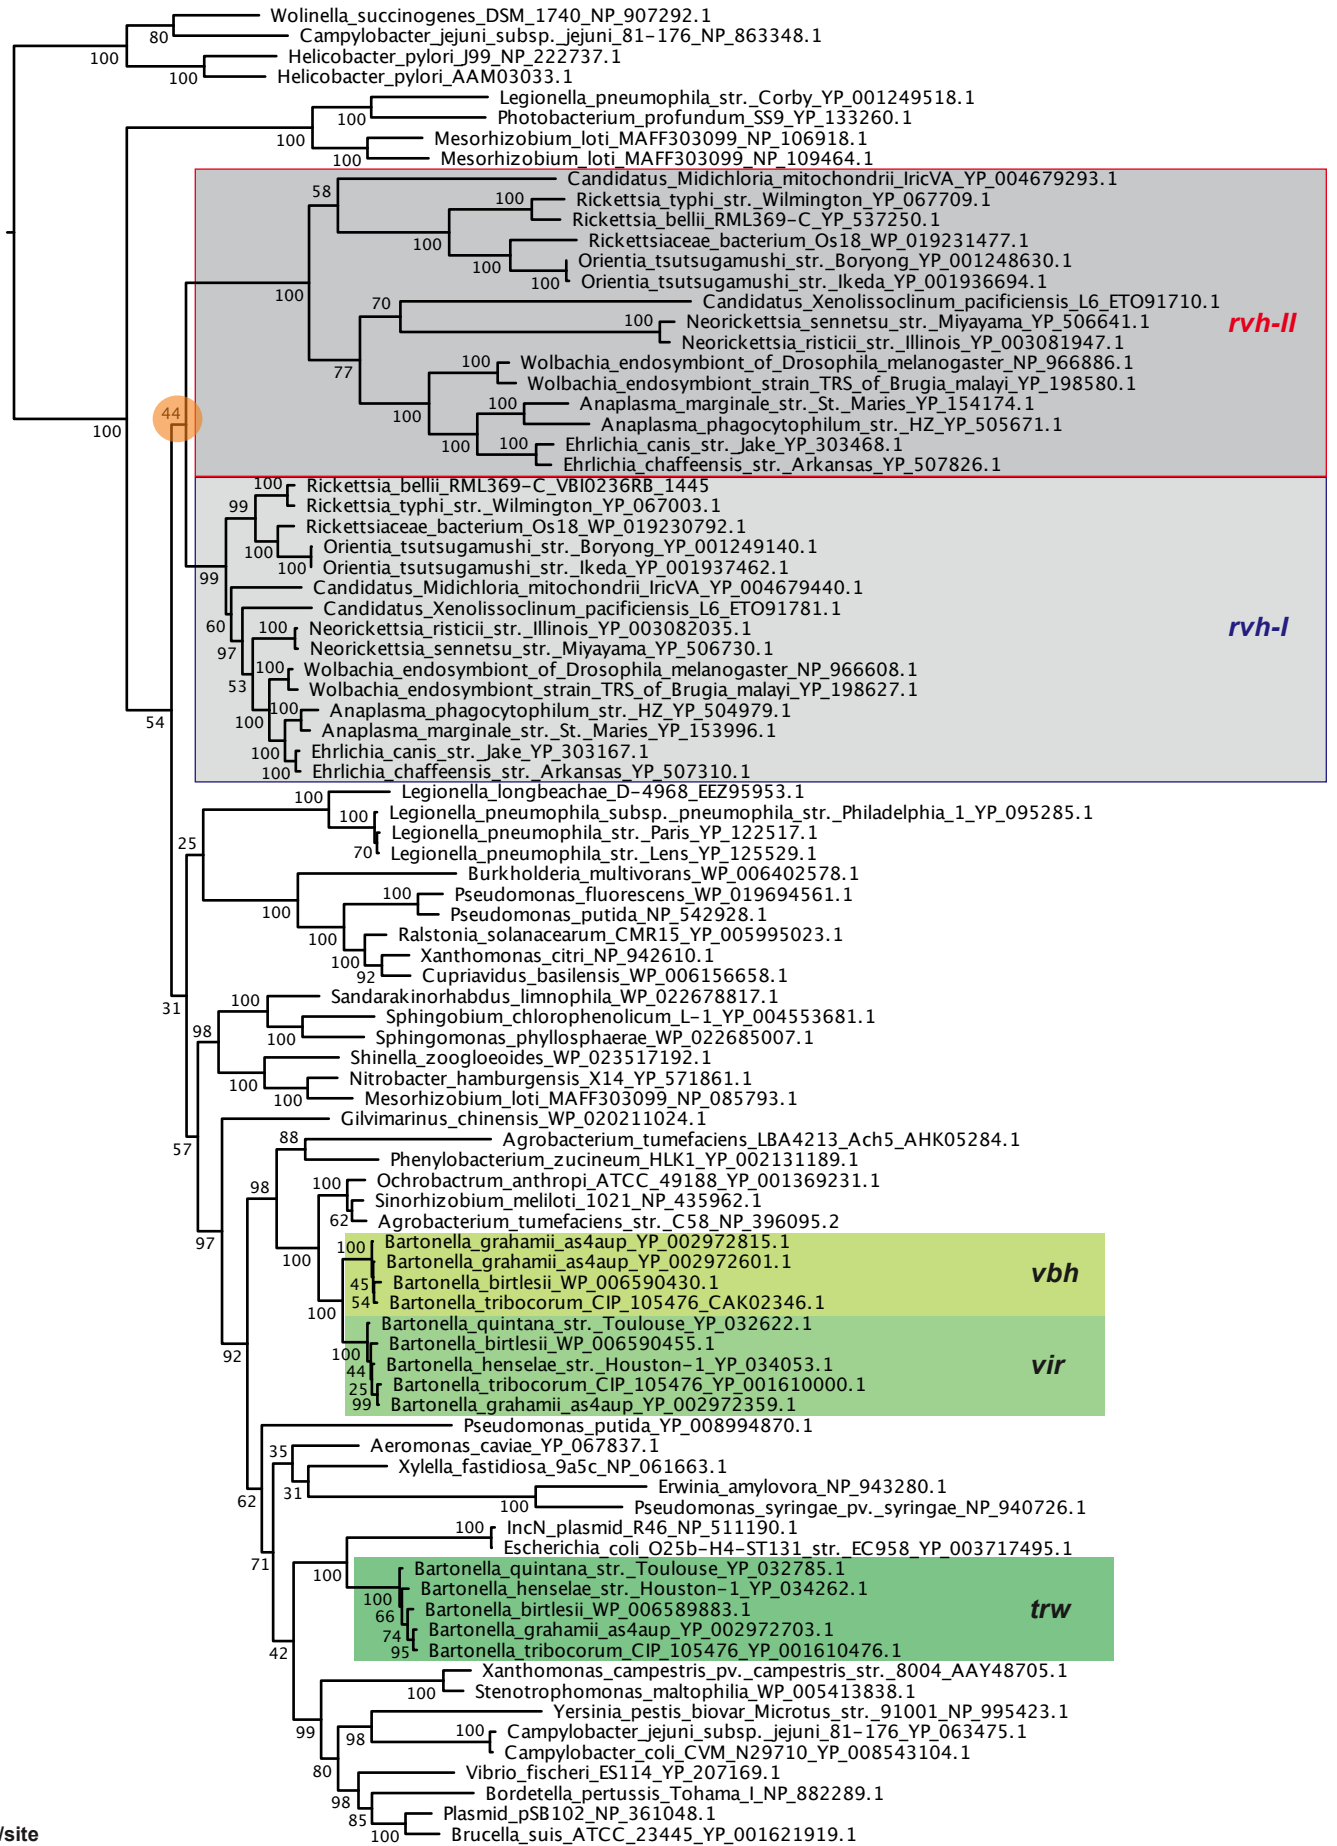

Fig. 1 (Document S1)

— 0.1 sub/site



**D**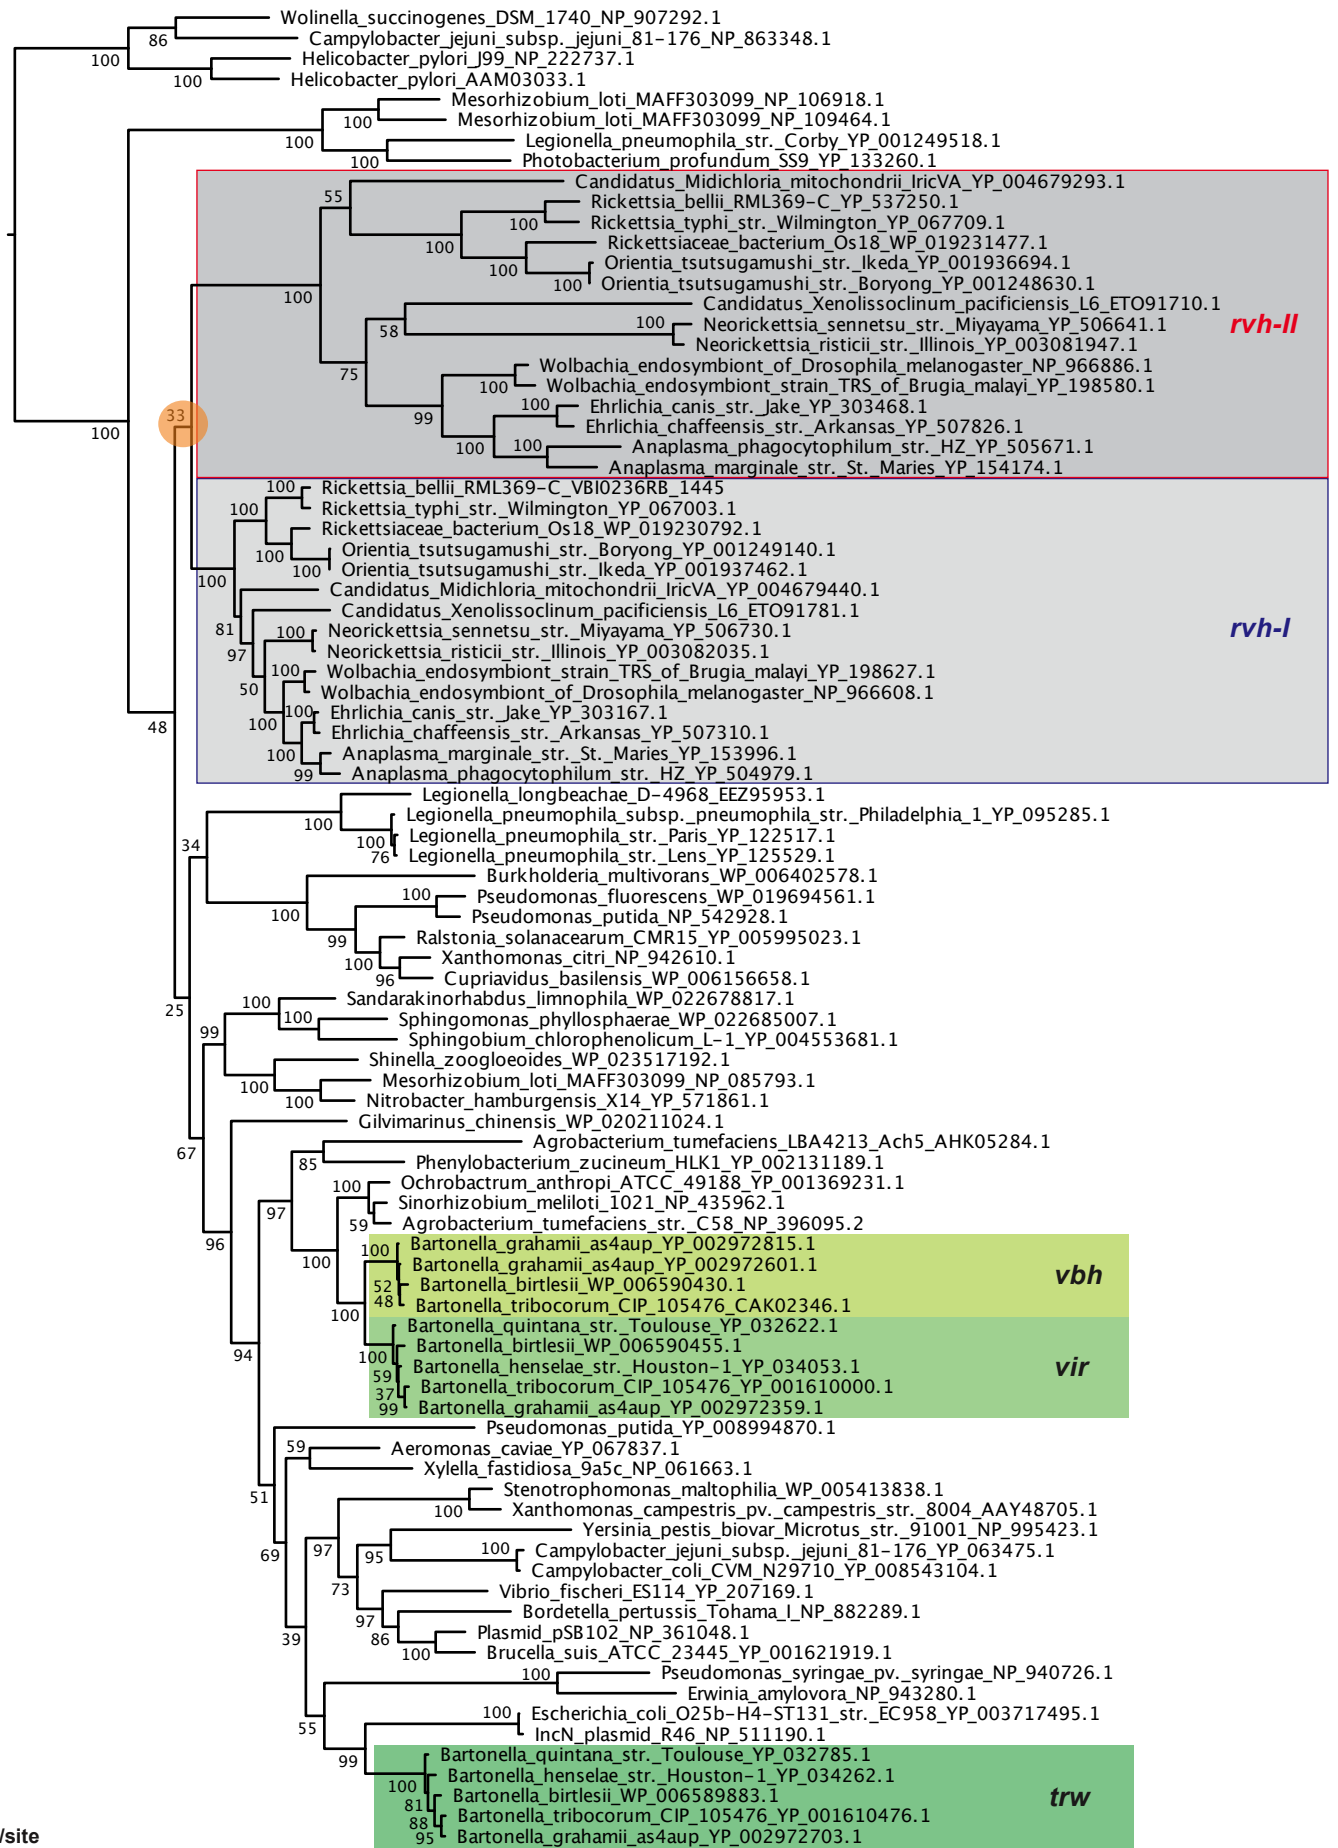**Fig. 1 (Document S1)**

— 0.1 sub/site

**E**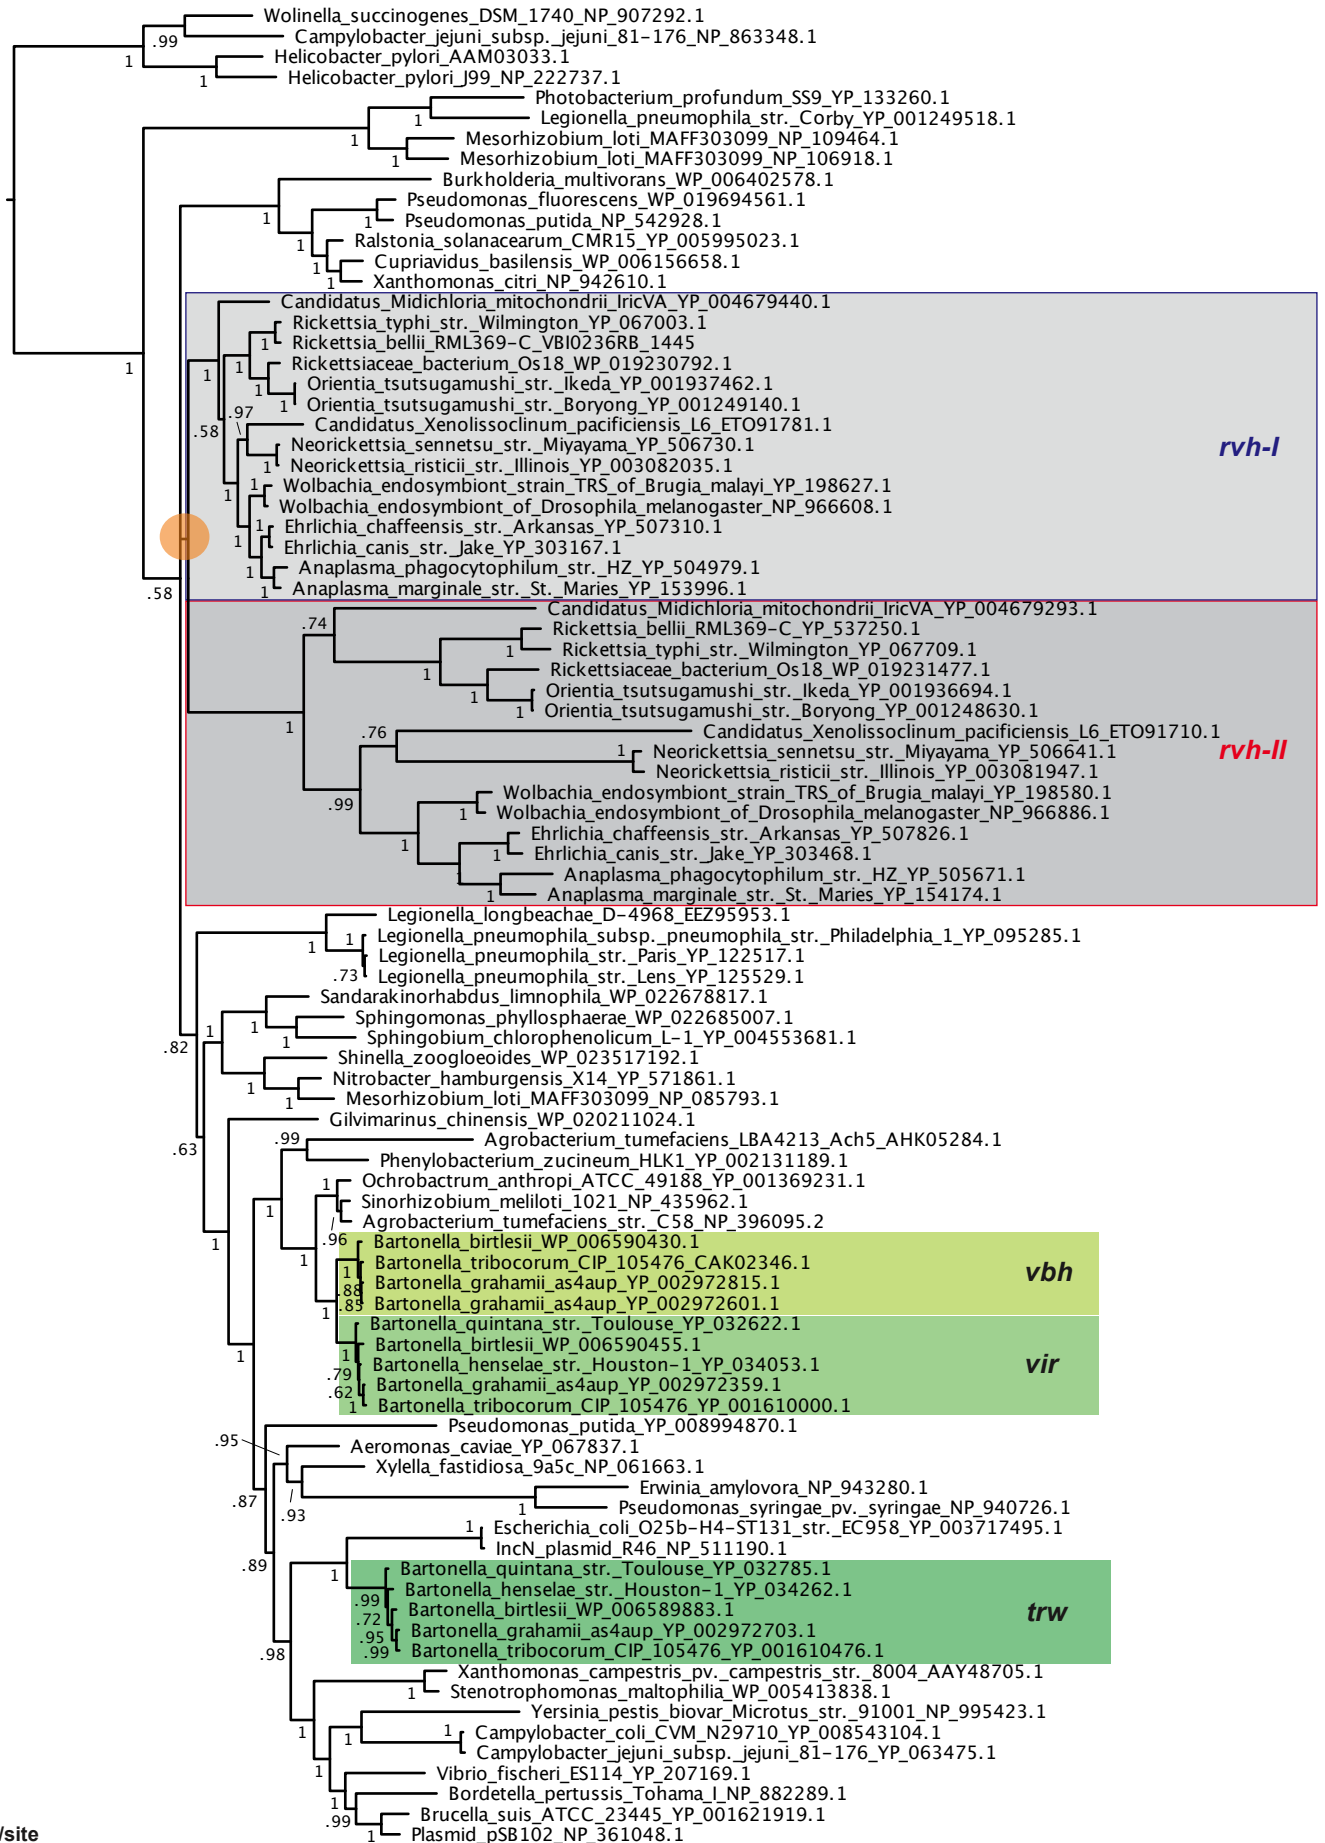**Fig. 1 (Document S1)**

— 0.1 sub/site
