# Supplementary material for: Structural Insight into How Bacteria Prevent Interference between Multiple Divergent Type IV Secretion Systems
Source: PubMed Central journal article supplement — mBio. 2015 Dec 8;6(6):e01867-15. doi: 10.1128/mBio.01867-15 (PMC4676284; doi:10.1128/mbio.01867-15), 2015-12-08
Supplement: mbo006152580s3.pdf [file mbo006152580s3.pdf]

**Document S3.** Relative conservation of *Bartonella* TrwG, VirB8 and VbhB8 proteins.

### **Intra-genome sequence conservation of VirB8 family proteins from five *Bartonella* species**

Fourteen VirB8 family proteins were aligned across five *Bartonella* species: *B. grahamii* str. as4aup (VirB8, TrwG, VbhB8-1, VbhB8-2), *B. tribocorum* str. CIP 105476 (VirB8, TrwG, VbhB8), *B. birtlesii* str. LL-WM9 (VirB8, TrwG, VbhB8), *B. henselae* str. Houston-1 (VirB8, TrwG), and *B. quintana* str. Toulouse (VirB8, TrwG). Complete proteins were aligned using MUSCLE (default parameters) (Edgar 2004), with TMHMM v.2.0 (Krogh et al. 2001) used to demarcate the boundaries between the cytoplasmic/TMS region (N-terminal domain) and periplasmic C-terminal domain of all proteins. Percent identity matrices (calculated by MUSCLE) were used to provide estimates of divergence across full-length sequences, as well as the NT and CT domains (Table 1). NCBI GenBank accession numbers for all proteins are provided in Document S1.

### **Conservation of the N-terminal/TMS region of *Bartonella* TrwG, VirB8 and VbhB8 proteins**

Multiple sequence alignment of the NT sequences and complete TMS regions for fourteen VirB8 family proteins across five *Bartonella* species (fig 1). Sequences are those analyzed in Table 1 above. Predicted TMS regions are colored blue. Highlighting as follows: yellow, conserved across TrwG, VirB8 and VbhB8 proteins; orange, conserved in TrwG and VirB8 proteins; green, conserved in VirB8 and VbhB8 proteins.

## **REFERENCES**

- Edgar RC. 2004. MUSCLE: Multiple sequence alignment with high accuracy and high throughput. *Nucleic Acids Res.* 32:1792–1797.
- Krogh A, Larsson B, von Heijne G, Sonnhammer EL. 2001. Predicting transmembrane protein topology with a hidden Markov model: application to complete genomes. *J. Mol. Biol.* [Internet] 305:567–580. Available from: <http://www.ncbi.nlm.nih.gov/pubmed/11152613>

**Table 1 (Document S3)**

**Table 1 (Document S3).** Intra-genome sequence conservation of VirB8 family proteins from five *Bartonella* species.

|                      | VirB8 vs. TrwG <sup>1</sup> |                  |                  | TrwG vs. VbhB8 <sup>1</sup> |                  |                  | VirB8 vs. VbhB8 <sup>1</sup> |                  |                  | VbhB8-1 vs. VbhB8-2 <sup>1</sup> |                  |                  |
|----------------------|-----------------------------|------------------|------------------|-----------------------------|------------------|------------------|------------------------------|------------------|------------------|----------------------------------|------------------|------------------|
|                      | AII <sup>2</sup>            | NTD <sup>3</sup> | CTD <sup>4</sup> | AII <sup>2</sup>            | NTD <sup>3</sup> | CTD <sup>4</sup> | AII <sup>2</sup>             | NTD <sup>3</sup> | CTD <sup>4</sup> | AII <sup>2</sup>                 | NTD <sup>3</sup> | CTD <sup>4</sup> |
| <i>B. grahamii</i>   | 29.4                        | 15.4             | 35.3             | 28.8                        | 15.4             | 34.5             | 57.7                         | 42.3             | 62.4             | 88.8                             | 94.2             | 87.1             |
| <i>B. tribocorum</i> | 29.4                        | 15.4             | 35.3             | 28.8                        | 17.3             | 33.9             | 59.0                         | 40.4             | 64.1             | -----                            | -----            | -----            |
| <i>B. birtlesii</i>  | 25.3                        | 7.7              | 32.3             | 30.2                        | 17.3             | 35.7             | 57.2                         | 30.8             | 64.7             | -----                            | -----            | -----            |
| <i>B. henselae</i>   | 28.1                        | 13.5             | 34.1             | -----                       | -----            | -----            | -----                        | -----            | -----            | -----                            | -----            | -----            |
| <i>B. quintana</i>   | 27.2                        | 11.5             | 33.5             | -----                       | -----            | -----            | -----                        | -----            | -----            | -----                            | -----            | -----            |

<sup>1</sup> % amino acid identity, as calculated from a percent identity matrix across alignments.

<sup>2</sup> Entire protein.

<sup>3</sup> NT-domain, which includes cytoplasmic region and predicted transmembrane-spanning region.

<sup>4</sup> CT-domain, which includes short unstructured periplasmic region and globular domain.

TrwG

*B. quintana*  
*B. henselae*  
*B. birtlesii*  
*B. grahamii*  
*B. tribocorum*

MKKKEVKPVKAERLNSYYEESRGLERELIGEFIRSRTAWRVACVVGIFGLFGMCGVVG  
MTKKQVKPIKAEQLNSYYEESRGLERELISEFIKSRKTAWRVAGVVGVFGLFGMCGVVG  
MKKQQAQVTAEKLSYYEESRGLERELINEFVRSRRTAWRVANVVGIFGLFGMICGVVG  
MKTQVKPVKAEQLSSYYEESRGLERDLINEFIRSRTAWRVASTVGLFGLFGMICGVVG  
MKTQAKPVKAEQLSSYYEESRGLERDLINEFIRSRTAWRVASAVGLFGLFGMICGVVG

VirB8

*B. quintana*  
*B. henselae*  
*B. birtlesii*  
*B. grahamii*  
*B. tribocorum*

-----MKSDAFDEVKEARSFDIDRMHSLQQRMRIAMTLTVLFGMTIALALAVAAL  
-----MKINEFNEYIKEARSFDIDRMHGMQRMRIAMALTVLFGMTIALALAVAAL  
-----MKSNEFDEYIKEARSFDIDRMHSMRVRMKVSMALTVLFGMTIALALAVAAL  
-----MKSDALEEYIKEARSFDIDRMHSMRVRMKISMALTVLFGMTIALALAVAAL  
-----MKSDALEEYIKEARSFDIDRMHGMVRMKISMALTVLFGMTIALALAVAAL

VbhB8

*B. birtlesii*  
*B. tribocorum*  
*B. grahamii*  
*B. grahamii*

-----MKEKDVEQYIAEARLFDQDRILASRRITRASLTIAAIVIVATLSSIAVITL  
-----MKQKDIEQYIAEARLFDQDRMLASRRITRASLAIAAISVIVALISSLAVITL  
-----MKEKDIEQYIAEARLFDQDRMLASRRITRVSLAIAAGIAVAVAIMSSLAVITL  
-----MKENAVEQYIAEARLFDQDRMLASRRITRVSLAIAAGIAVAVAIMSSLAVITL

: . . . . \* \* : \* : : : . : : : . : .

Fig. 1 (Document S3)
