# Supplementary material for: Structural Insight into How Bacteria Prevent Interference between Multiple Divergent Type IV Secretion Systems
Source: PubMed Central journal article supplement — mBio. 2015 Dec 8;6(6):e01867-15. doi: 10.1128/mBio.01867-15 (PMC4676284; doi:10.1128/mbio.01867-15), 2015-12-08
Supplement: mbo006152580s4.pdf [file mbo006152580s4.pdf]

## Supplementary document S4. Structural modeling of VirB8 family proteins.

### Structural alignment for eight proteins of the VirB8 family

For structural modeling, target sequences were computationally aligned to a set of templates and manually curated. The template alignment was constructed with eight structures downloaded from the Protein DataBank (Berman et al. 2000): 4MEI, VirB8 of *Bartonella tribocorum*; 2BHM, VirB8 of *Brucella suis* (Terradot et al. 2005); 4LSO, VirB8 of *Bartonella quintana*; 4JF8, TrwG of *Bartonella birtlesii*; 4KZ1, VirB8 of *Bartonella grahamii*; 2CC3, VirB8 of *Agrobacterium tumefaciens* (Bailey et al. 2006); 4NHF (chain A), TrwG of *Bartonella grahamii*; 4O3V, RvhB8-II of *Rickettsia typhi* (fig. 1). (A) Structural alignment generated using SPDBV/Deep View (Guex and Peitsch 1997). Sequence coordinates are described in panel B. Magenta cylinders and gray arrows depict the  $\alpha$ -helices and  $\beta$ -strands for the VirB8 structure of *Bartonella tribocorum*, with highlighted regions depicting the conserved regions utilized to align target sequences to the templates (see Materials and Methods for further information). (B) Protein sequences retrieved from UniProt that correspond to the structures shown in panel A. Red coloring depicts the portion of the protein included in each respective structure, with regions shown in the alignment in bold. Yellow highlighting depicts regions from the *B. suis* and *R. typhi* proteins that are absent from the structures.

### Analysis of a putative RvhB8-I/RvhB8-II heterodimer

Examination of a potential heterodimer formed by *R. typhi* RvhB8-I (YP\_067242, modeled structure) and RvhB8-II (YP\_067240, PDBID: 4O3V) proteins (fig. 2). See text for explanation of protein modeling procedures. (A) Ribbon representation of modeled RvhB8-I/RvhB8-II heterodimer. The major dimerization site involving residues of  $\alpha$ -helix  $\alpha$ 1 and the 'NPxG' motif is boxed and enlarged at right. RvhB8-II residues are denoted with primes. Note: the minor dimerization site involving residues within the loop between  $\alpha$ -helices  $\alpha$ 1 and  $\alpha$ 2 is not supported in this model. (B) Sequence alignment of *R. typhi* RvhB8-I and RvhB8-II proteins, with secondary structure assignment. Sequences are the globular domains depicted in panel A. For each protein, residues involved in the dimerization interface are within black boxes. Invariant residues are highlighted yellow. Magenta cylinders and gray arrows depict the  $\alpha$ -helices and  $\beta$ -strands for the RvhB8-I and RvhB8-II structures (see fig. 5 of the manuscript). For RvhB8-II, the brown star denotes the break in the structure, with missing residues colored white. Note: residues involved in the minor dimerization site of the RvhB8-I and RvhB8-II homodimers are highlighted green.

## Assessing the structures of VirB8 family proteins lacking a conserved ‘NPxG’ motif

Structural models generated for 16 VirB8 sequences exhibiting divergent ‘NPxG’ motifs within the major dimerization site (**fig. 3**). See text for explanation of protein modeling procedures. (A) **NWDG** of LvhB8, *Legionella longbeachae* D-4968 (EEZ95948); (B) **NLLG** of hypothetical protein XPN\_1731, *Xanthomonas arboricola* pv. pruni MAFF 301427 (GAE59825); (C) **NGMG** of TriG, *Escherichia coli* TW00353 (EKI31743); (D) **NDIG** of VirB8, *Pseudomonas putida* LD209 (AHC05756); (E) **NIFG** of hypothetical protein F892\_00045, *Acinetobacter* sp. NIPH 2168 (ENX24895); (F) **NPTD** of competence protein, *Helicobacter pylori* Hp A-17 (EJB46117); (G) **NSLG** of VirB8, *Ralstonia solanacearum* CMR15 (CBJ36145); (H) **NSRG** of VirB8, *Pseudomonas syringae* pv. syringae SM (EPF64149); (I) **RPTG** of VirB8, *Hydrogenophaga* sp. T4 (EWS64160); (J) **TPIS** of hypothetical protein CPS\_0790, *Colwellia psychrerythraea* 34H (AAZ25142); (K) **NPHL** of conjugal transfer protein TrbF, *Legionella pneumophila* Corby (YP\_001249519); (L) **NGTG** of type IV secretion protein, *Burkholderia multivorans* CGD1 (WP\_006402582); (M) **NALG** of VirB8, *Xanthomonas citri* subsp. citri (NP\_942615); (N) **NPLA** of conjugative transfer protein, *Stenotrophomonas maltophilia* EPM1 (WP\_005410125); (P) **NYFG** of VirB8, *Yersinia pestis* biovar Microtus str. 91001 (NP\_995427); note, this structure is shown in **fig. 6G** of the manuscript. Residues in bold define all of these ‘NPxG’ variants.

## REFERENCES

- Bailey S, Ward D, Middleton R, Grossmann JG, Zambryski PC. 2006. Agrobacterium tumefaciens VirB8 structure reveals potential protein-protein interaction sites. Proc. Natl. Acad. Sci. U. S. A. 103:2582–2587.
- Berman HM, Westbrook J, Feng Z, Gilliland G, Bhat TN, Weissig H, Shindyalov IN, Bourne PE. 2000. The Protein Data Bank. Nucleic Acids Res. [Internet] 28:235–242. Available from: <http://www.pubmedcentral.nih.gov/articlerender.fcgi?artid=102472&tool=pmcentrez&rendertype=abstract>
- Guex N, Peitsch MC. 1997. SWISS-MODEL and the Swiss-PdbViewer: an environment for comparative protein modeling. Electrophoresis [Internet] 18:2714–2723. Available from: <http://www.ncbi.nlm.nih.gov/pubmed/9504803>
- Terradot L, Bayliss R, Oomen C, Leonard GA, Baron C, Waksman G. 2005. Structures of two core subunits of the bacterial type IV secretion system, VirB8 from Brucella suis and ComB10 from Helicobacter pylori. Proc. Natl. Acad. Sci. U. S. A. 102:4596–4601.

**A**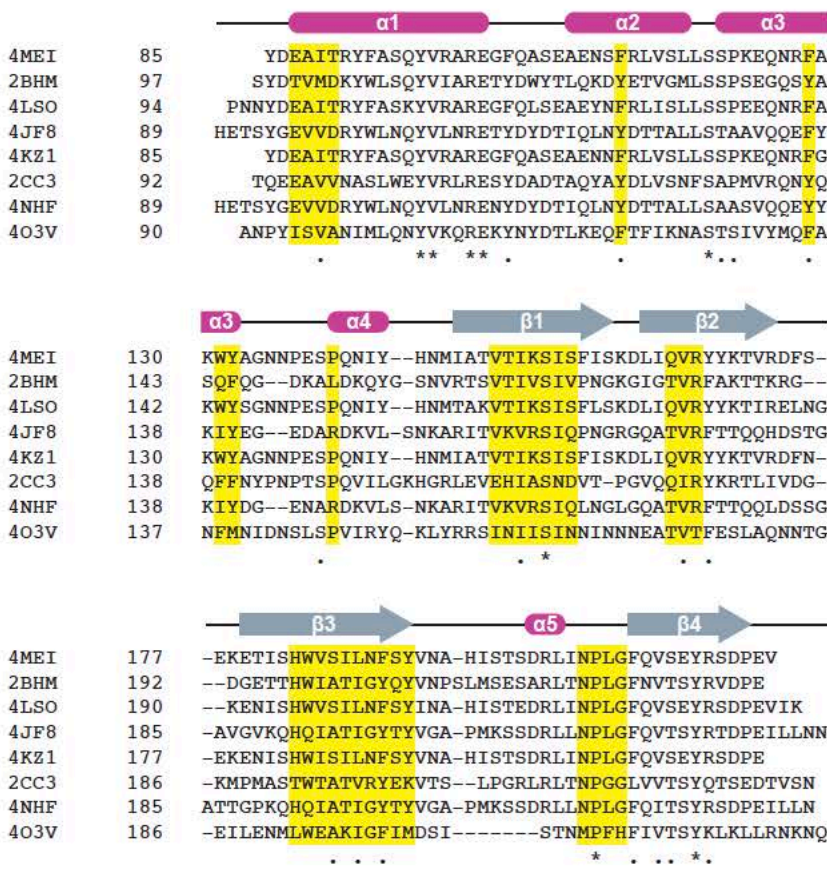**B**

>tr|A9IWN6|A9IWN6\_BART1 VirB8 protein OS=Bartonella tribocorum (strain CIP 105476 / IBS 506)  
 MKSDALEEYI KEARSFDIDRMHGMVRM KISMALTVLFG LMTIALALAVAAL TPLKTVPEPFVIRVDNSTGIIDTVSALKESPSDYDEAITRYFASQYVRARE  
 GFQASEAENSFRLVSLSSPKEQNRFAK WYAGNPNESPQNIYHNMIATVTIKSISFISKDLIQVRYKTVRDFSEKETISHWVSIILNFSYVNAHISTDRLI  
 NPLGFQVSEYRS DPEVIK

>sp|Q7CEG3|VIRB8\_BRUSU Type IV secretion system protein virB8 OS=Brucella suis biovar 1 (strain 1330)  
 MFGRKQSPQKSVKNGQGNAPSVD EALNWEAAHVRLVEKSERRAWKIAGAFGTITVLLGIGIAGMLPLKQHVPLYVRVNAQTGAPDILTSLDEKSVSYDTVM  
 DKYWLSQYVIARETYDWTYTLQKDYETVGLSSPSEGQSYASQFQGDKALDKQYGSNVRTSVTIVSIVPNGKIGTVRFAKTTKRTNETGDGETTHWIATIGY  
 QYVNP SLMSESARLTNPLGFNVTSYRVDPEMGVVQ

>sp|Q6FYW3|VIRB8\_BARQU Type IV secretion system protein virB8 OS=Bartonella quintana (strain Toulouse)  
 MKNSLIKIRKSLVKSADAFDEYVKEARSFDIDRMHSLQQRMIAMTLTVLFG LMTIALALAVAAL TPLKTVPEPFVIRVDNSTGIIE TVSALKETPNNYDEAIT  
 RYFAGKYVRAREGFQLSEAEYFNRLISLLSSPPEEQNRFAK WYSGNPNESPQNIYHNMTAKVTIKSISFISKDLIQVRYKTIRELNGKENISHWVSIILNFSY  
 INAHISTEDRLINPLGFQVSEYRS DPEVIK

>tr|D0AAZ5|D0AAZ5\_9RHIZ TrwG component of type IV secretion system OS=Bartonella birtlesii  
 MKKQQAQQTVAEKLKSYEESRGLERELINEFVRSRRTAWRVANVVGIFGLFGMICGVVGFSPAP TPLVLRVDNTTGAVDVISVMREHETSYGEVVDRYWL  
 NQYVNLNRETYDYDTIQLNYDTTALLSTA AVQQEFYKIYEGEDARDKVL-SNKARITVKVRSIQPNGRGQATVRFQTQHDSTGAVGVKQHQIATIGYTYVGA  
 MKSSDRLLNPLGFQVTSYRTDPEILLN

>tr|C6AER9|C6AER9\_BARGA VirB8 protein OS=Bartonella grahamii (strain as4aup)  
 MKSDALEEYI KEARSFDIDRMHSMVRM KISMALTVLFG LMTIALALAVAAL TPLKTVPEPFVIRVDNSTGIIDTVSALKESPN DYDEAITRYFASQYVRARE  
 GFQASEAENNFRLVSLSSPKEQNRFGK WYAGNPNESPQNIYHNMIATVTIKSISFISKDLIQVRYKTVRDFNEKENISHWVSIILNFSYVNAHISTDRLI  
 NPLGFQVSEYRS DPEVIK

>sp|P17798|VIRB8\_AGRFC Protein virB8 OS=Agrobacterium fabrum (strain C58 / ATCC 33970)  
 MKGSEYALLVARETLAEHYKEVEAFQTARAKSARRLSKVIAAVATIAVLGNVAQAF TIATMVPLIRLVPVYLWIRPDGTV DSEVSRLPATQEEAVVNASL  
 WEYVRLRESYDADTAQYAYDLVSNFSAPMVRQNYQFFNYPNPTSPQVILGKHGRLEVEHIASNDVTPGVQQIRYKRTLIVDGKMPMASTWTATVRYEKVTS  
 LPGRLRLTNPGGLVVTYSYQTS EDTVSNAGHSEP

>tr|C6AAT5|C6AAT5\_BARGA TrwG protein OS=Bartonella grahamii (strain as4aup)  
 MKTKQVKPVKAEQLSSYIEESRGLERDLIN E FIRSRRTAWRVASTVGLFG LFGMICGVVGFSPAP TPLVLRVDNTTGAVDVISVMREHETSYGEVVDRYWL  
 NQYVNLNRENYDYDTIQLNYDTTALLSAASVQQEYKYIYDGENARDKVL-SNKARITVKVRSIQNLGLGQATVRFQTQLDSSGATGPKQHQIATIGYTYVGA  
 PMKSSDRLLNPLGFQITSYRS DPEILLND

>tr|Q68X84|Q68X84\_RICTY VirB8-like protein OS=Rickettsia typhi (strain ATCC VR-144 / Wilmington)  
 MDQLTNAIKEYIKSGEYFIDARKWYNFKYILPLSHRSFLLLTCTIF TLLLTLIGVNIINILPIQKVG YLIKDDSEKQATITNTKYSTLANPYISVANIMLQ  
 NYVKQREKYNNDTLKEQFTFIKNASTSIVYMQFANFMNIDNSLSPVIRYQKLYRRSINIISINNINNEATVTFESLAQNNTGEILENMLWEAKIGFIMDSI  
 STSTLHNMPPHFIVTSYKLLLRNKNQ

**Fig. 1 (Document S4)**



A

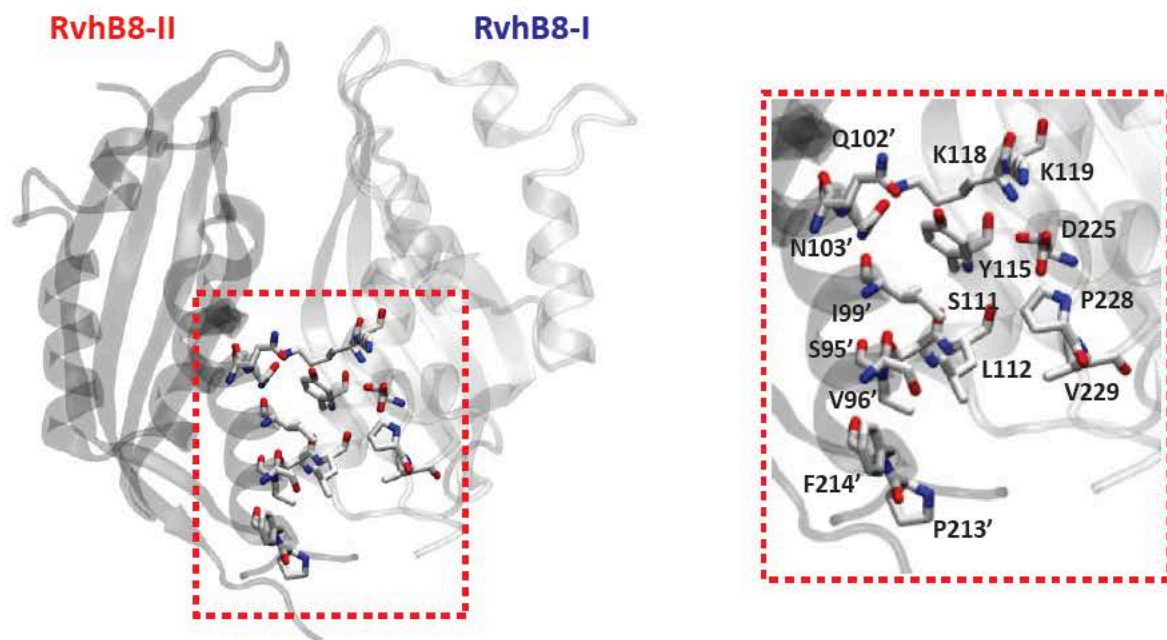

B

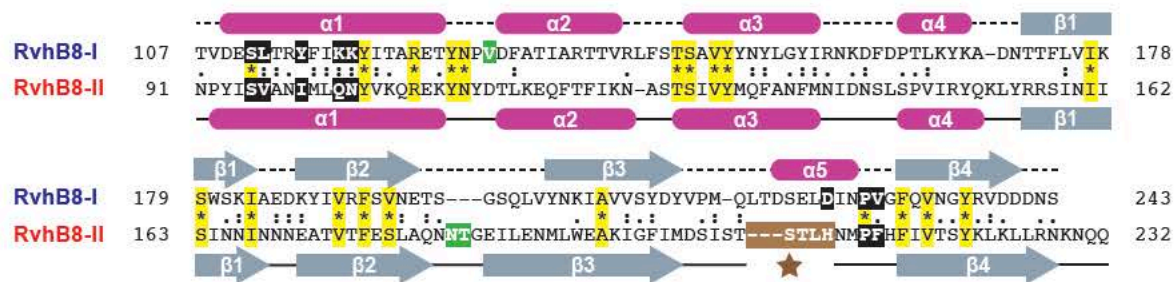

Fig. 2 (Document S4)

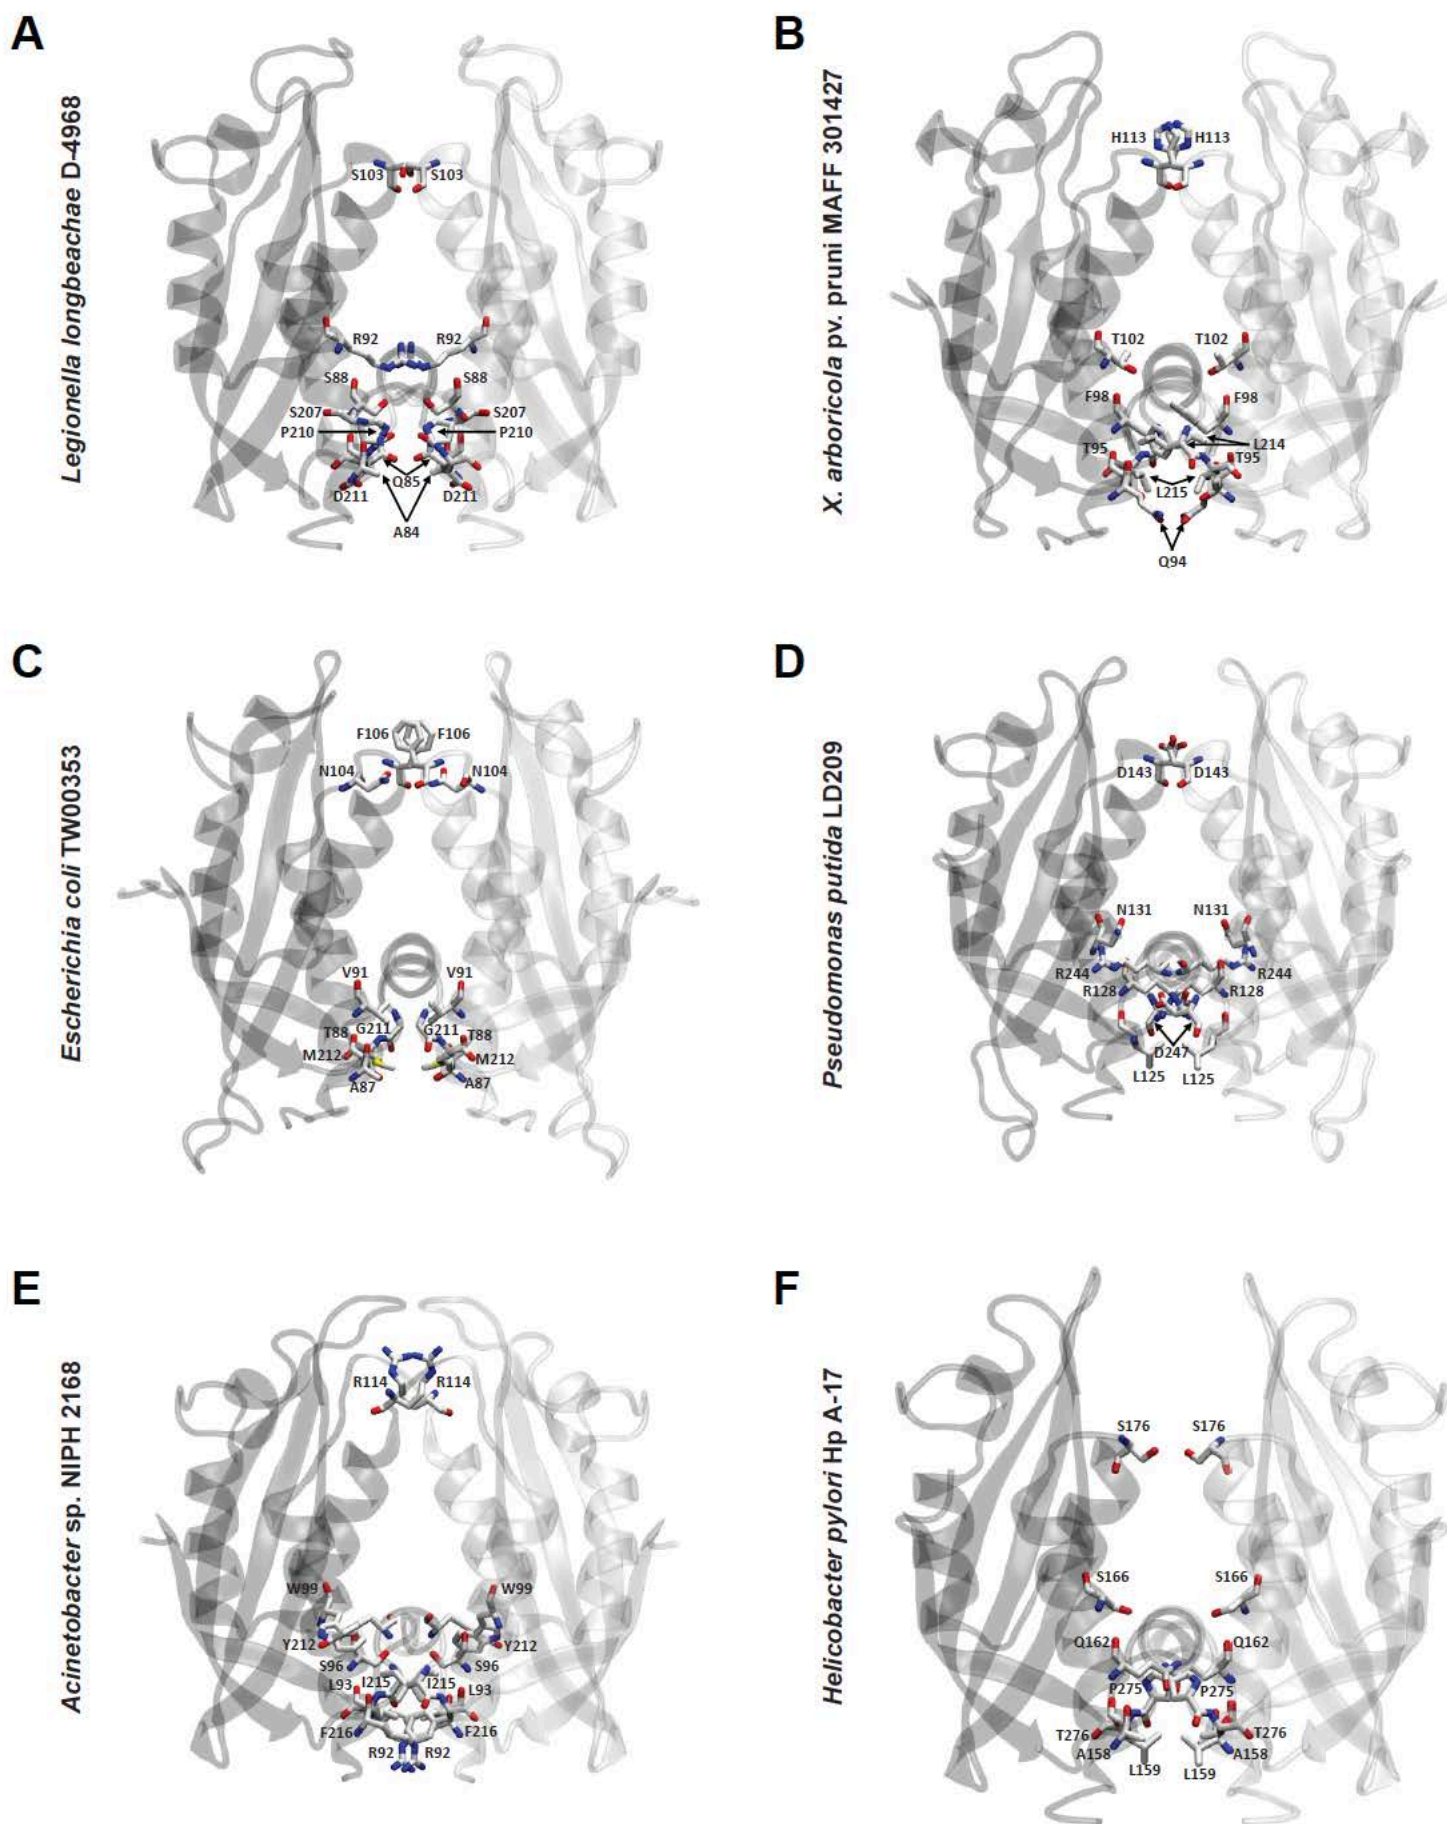

**Fig. 3 (Document S4)**

**G***Ralstonia solanacearum* CMR15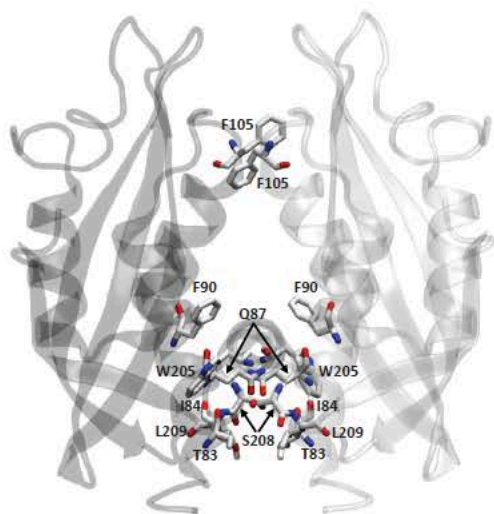**H***Pseudomonas syringae* pv. *syringae* SM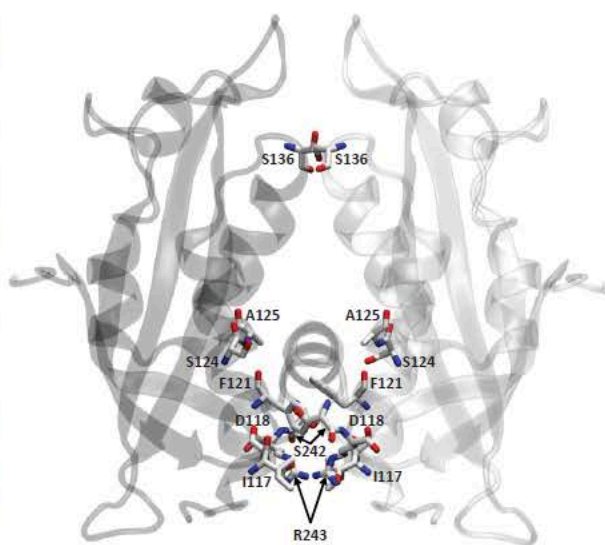**I***Hydrogenophaga* sp. T4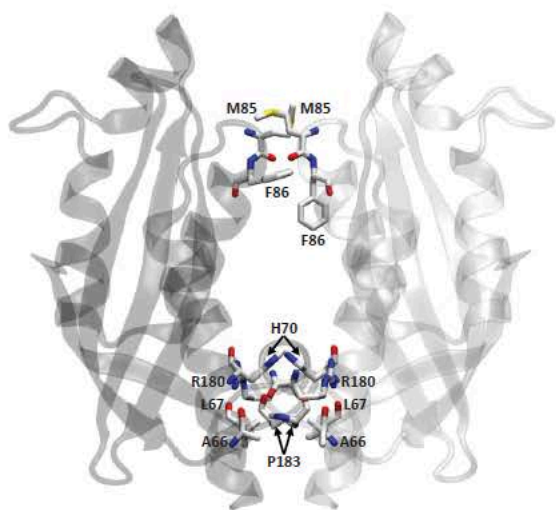**J***Colwellia psychroerythraea* 34H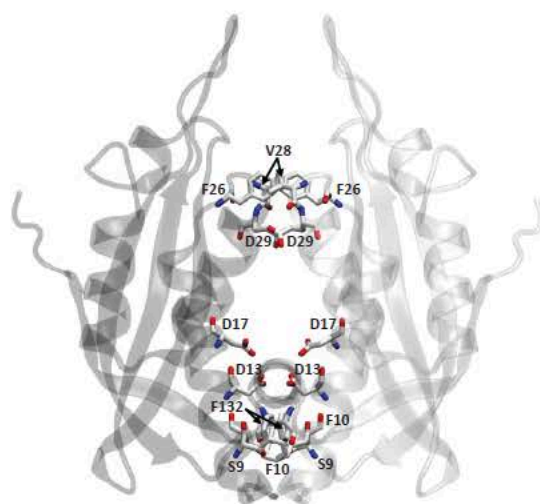**K***Legionella pneumophila* Corby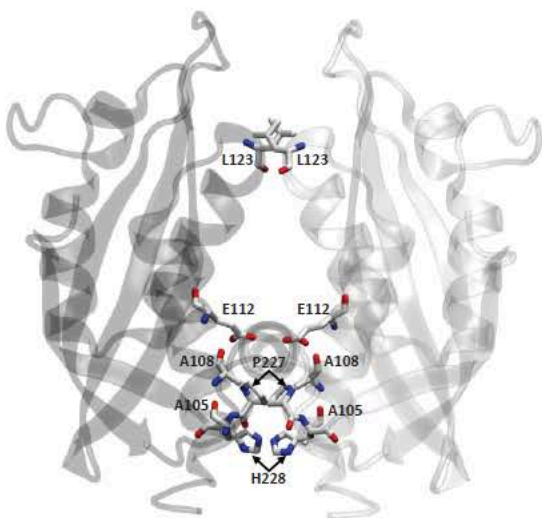**L***Burkholderia multivorans* CGD1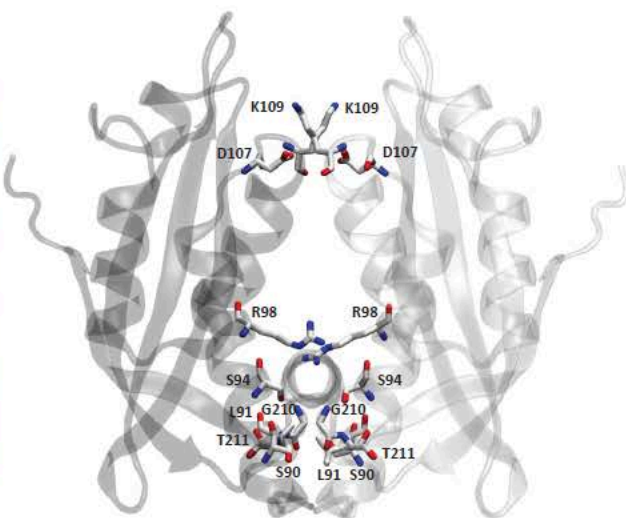**Fig. 3 (Document S4)**



**M***Xanthomonas citri* subsp. *citri*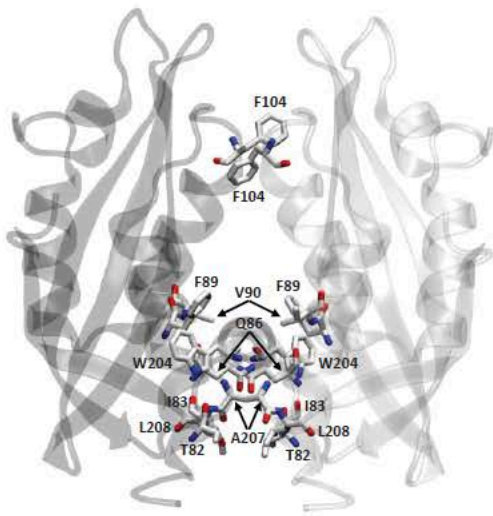**N***Stenotrophomonas maltophilia* EPM1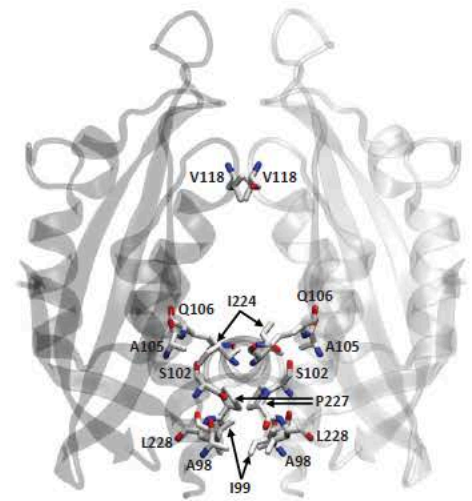**O***Yersinia pestis* bv. *Microtus* str. 91001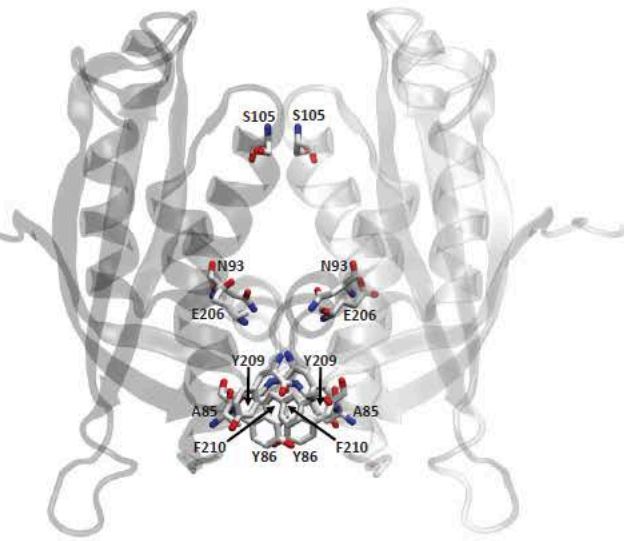**Fig. 3 (Document S4)**
