# Supplementary material for: Structural Insight into How Bacteria Prevent Interference between Multiple Divergent Type IV Secretion Systems
Source: PubMed Central journal article supplement — mBio. 2015 Dec 8;6(6):e01867-15. doi: 10.1128/mBio.01867-15 (PMC4676284; doi:10.1128/mbio.01867-15), 2015-12-08
Supplement: mbo006152580s6.pdf [file mbo006152580s6.pdf]

**Document S6.** Oligonucleotide primers and plasmids utilized for the *Bartonella* and *Rickettsia* experiments.

### **Oligonucleotide primers used for the *Bartonella* experiments**

Primers used for the generation of constructs utilized in the *Bartonella* bacterial two-hybrid assays are provided in **Table 1**. See manuscript (**Materials and Methods: Protein-Protein Interactions**) for further information regarding the design of each construct.

### **Plasmids used in the *Bartonella* experiments**

All plasmids utilized in the *Bartonella* bacterial two-hybrid assays are provided in **Table 2**. See manuscript (**Materials and Methods: Protein-Protein Interactions**) for further information regarding the design of each construct.

### **Oligonucleotide primers utilized in the *Rickettsia typhi* RT-qPCR experiments**

Primers used for the RT-qPCR assay during *R. typhi* infection of HeLa cells are provided in **Table 3**. Among the six reference genes utilized, *adr1* and *sca5* were selected for normalization of *rvhB8-I* and *rvhB8-II* gene expression.

**Table 1 (Document S6)**

**Table 1 (Document S6).** Oligonucleotide primers used for the *Bartonella* experiments.

| Primer           | Sequence (5'→3'), restriction sites underlined (restriction enzyme), mutagenic nucleotides underlined in bold |
|------------------|---------------------------------------------------------------------------------------------------------------|
| <b>prAPV-36</b>  | TTTTTTGGATCCCATGAAAAACAGCAAGCTAAAC (BamHI)                                                                    |
| <b>prAPV-37</b>  | TTTTTTGGTACCTTAATTATTTAGCAGTATTTTC (KpnI)                                                                     |
| <b>prAPV-52</b>  | TTTGGATCCCATGAAAACAAAACAAGTAAAACC (BamHI)                                                                     |
| <b>prAPV-53</b>  | TTGGTACCTTAATCATTTAACAGTATTTCTGGGTC (KpnI)                                                                    |
| <b>prAPV-54</b>  | TTTGGATCCCATGAAGCACGATCTGATAAACTG (BamHI)                                                                     |
| <b>prAPV-55</b>  | TTGGTACCTCATTTTATCACCTCTGGATCAGATCT (KpnI)                                                                    |
| <b>prAPT0326</b> | CATCTGTCCAACCTCCGCGACTC                                                                                       |
| <b>prAPT0328</b> | AGCGGACGTTCGAAGTTCTCGC                                                                                        |
| <b>prAPV-38</b>  | CTTGGTTTCCAAGTGACAAGT                                                                                         |
| <b>prAPV-39</b>  | <b>TGC</b> ATTAAGCAATCGATCAGATG                                                                               |
| <b>prAPV-40</b>  | <b>GGCGGC</b> GACAGATATTGGCTCAAC                                                                              |
| <b>prAPV-41</b>  | TTCGCCATAGCTAGTTTCATG                                                                                         |

**Table 2 (Document S6)****Table 2 (Document S6).** Plasmids used in the *Bartonella* experiments.

| Plasmid                  | Relevant characteristics                                                                                                         | Reference or source |
|--------------------------|----------------------------------------------------------------------------------------------------------------------------------|---------------------|
| <b>pKT25</b>             | Bacterial two-hybrid plasmid, allows cloning to the 3' end of the T25 fragment of <i>Bordetella pertussis</i> adenylate cyclase. | Prof. Urs Jenal     |
| <b>pUT18c</b>            | Bacterial two-hybrid plasmid, allows cloning to the 3' end of the T18 fragment of <i>Bordetella pertussis</i> adenylate cyclase. | Prof. Urs Jenal     |
| <b>pKT25-<i>zip</i></b>  | Bacterial two-hybrid plasmid, positive interaction control plasmid                                                               | Prof. Urs Jenal     |
| <b>pUT18c-<i>zip</i></b> | Bacterial two-hybrid plasmid, positive interaction control plasmid                                                               | Prof. Urs Jenal     |
| <b>pAPV001</b>           | Derivative of pKT25 encoding for T25-TrwG ( <i>B. birtlesii</i> ) phusion protein.                                               | This work           |
| <b>pAPV002</b>           | Derivative of pUT18c encoding for T18-TrwG ( <i>B. birtlesii</i> ) phusion protein.                                              | This work           |
| <b>pAPV003</b>           | Derivative of pKT25 encoding for T25-TrwG ( <i>B. grahamii</i> ) phusion protein.                                                | This work           |
| <b>pAPV004</b>           | Derivative of pUT18c encoding for T18-TrwG ( <i>B. grahamii</i> ) phusion protein.                                               | This work           |
| <b>pAPV005</b>           | Derivative of pKT25 encoding for T25-VirB8 ( <i>B. grahamii</i> ) phusion protein.                                               | This work           |
| <b>pAPV006</b>           | Derivative of pUT18c encoding for T18-VirB8 ( <i>B. grahamii</i> ) phusion protein.                                              | This work           |
| <b>pAPV007</b>           | Derivative of prAPV001 encoding for T25-TrwG-P214A ( <i>B. birtlesii</i> ) phusion protein.                                      | This work           |
| <b>pAPV008</b>           | Derivative of prAPV001 encoding for T25-TrwG-V96G/V97A ( <i>B. birtlesii</i> ) phusion protein.                                  | This work           |
| <b>pAPV009</b>           | Derivative of pUT18c encoding for T25-TrwG-P214A ( <i>B. birtlesii</i> ) phusion protein.                                        | This work           |
| <b>pAPV010</b>           | Derivative of pUT18c encoding for T25-TrwG-V96G/V97A ( <i>B. birtlesii</i> ) phusion protein.                                    | This work           |

**Table 3 (Document S6)**

**Table 3 (Document S6).** Oligonucleotide primers utilized in the *Rickettsia typhi* RT-qPCR experiments.

| <b>Gene</b>     | <b>Forward Primer (5' to 3')</b> | <b>Reverse Primer (5' to 3')</b> |
|-----------------|----------------------------------|----------------------------------|
| <i>adr1</i>     | CCACACCAGCACCAGCAAAA             | GCACGGACAGTAGTTCAACC             |
| <i>adr2</i>     | CTTGCGCAGCAGTACCAAAA             | CTGGTGTTCGGTCCTGCATTA            |
| <i>gltA</i>     | TACGAATTGCTGGCTCATCA             | AAATGGATCATTTCCTTTAGCTTTAGC      |
| <i>sca5</i>     | TGGTATTACTGCTCAACAAGCT           | CAGTAAAGTCTATTGATCCTACACC        |
| <i>rpsL</i>     | CTCCTGCCTTAGAATCCAACCC           | TGAACGACCTTGCTTACGCC             |
| <i>16S rRNA</i> | CGCAACCCTTATTCTTATTTG            | CCTCTGTAAACACCATTGTAGCA          |
| <i>rvhB8-I</i>  | CACCTGTCATACGATATCAAAAGC         | CAATTTTTGCTTCCCATAGCA            |
| <i>rvhB8-II</i> | TCCAGTTGATTTTGCAACGA             | TGGCTTCCTGATGTTTCATTT            |
