# Supplementary material for: Structural Insight into How Bacteria Prevent Interference between Multiple Divergent Type IV Secretion Systems
Source: PubMed Central journal article supplement — mBio. 2015 Dec 8;6(6):e01867-15. doi: 10.1128/mBio.01867-15 (PMC4676284; doi:10.1128/mbio.01867-15), 2015-12-08

**Supplementary fig. 1.** Glutaraldehyde crosslinking experiments. Recombinant N-terminally HIS-tagged proteins, obtained from the SSGCID, were incubated in the presence of different concentrations of glutaraldehyde to stabilize the possible oligomeric forms of the proteins. The cross-linked proteins were resolved on SDS-PAGE, followed by immunoblotting with anti-HIS antibody (see manuscript for further details). (A) *B. grahamii* VirB8. Protein size is estimated at 20.9 kDa corresponding to residues 51-222, with N-terminal tag MAHHHHHHM. (B) *B. birtlesii* TrwG. Protein size is estimated at 20.4 kDa corresponding to residues 63-233, with N-terminal tag MAHHHHHHM. (C) *R. typhi* RvhB8-II (*left*) and RvhB8-I (*right*). For RvhB8-II, protein size is estimated at 21.2 kDa corresponding to residues 61-232, with N-terminal tag MAHHHHHHM. For RvhB8-I, protein size is estimated at 20.3 kDa corresponding to residues 76-243, with N-terminal tag MAHHHHHHM.

**A**

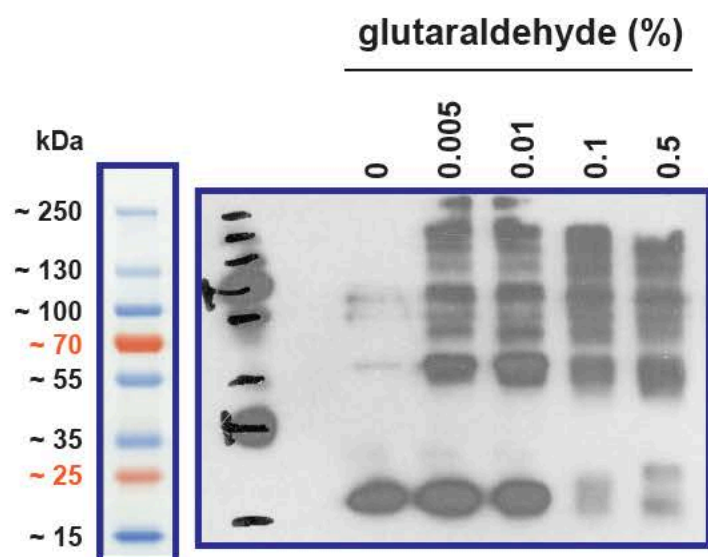

**B**

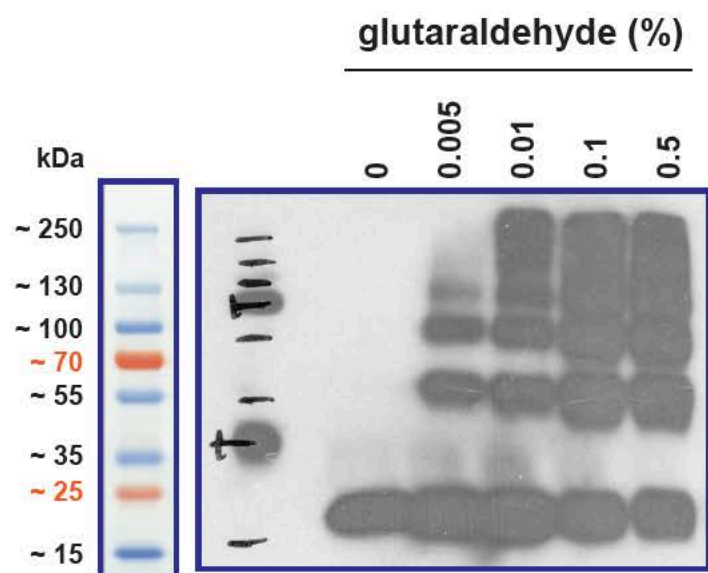

**C**

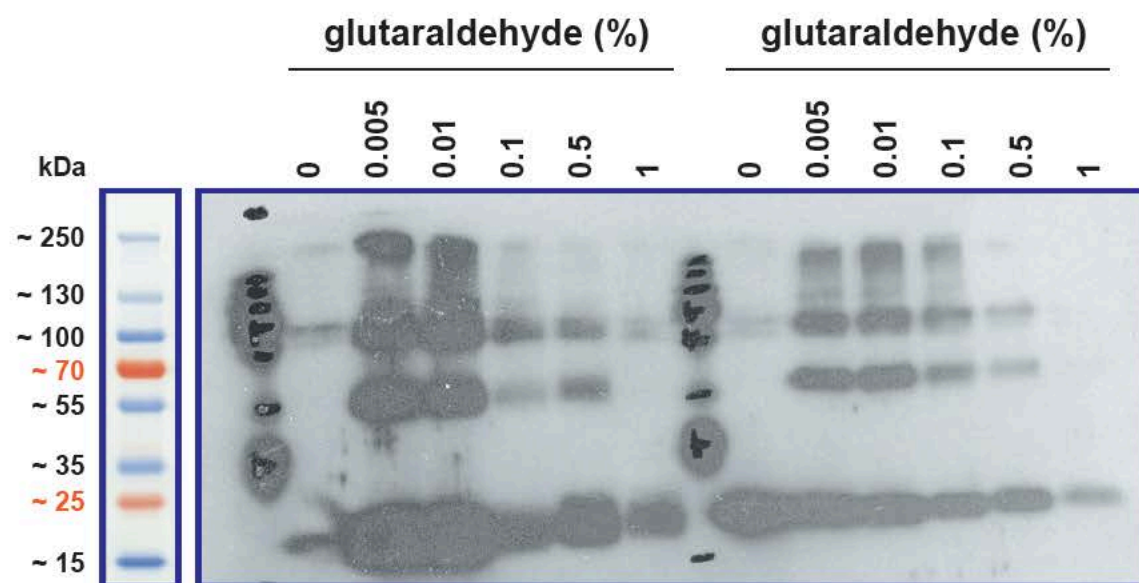

Supplement: mbo006152580sf1.pdf [file mbo006152580sf1.pdf]
